# Supplementary material for: Thermally stable ferrocene-α-cyanostilbenes as efficient materials for second order nonlinear optical polarizability
Source: Royal Society of Chemistry journal article supplement (doi:10.1039/c6ra10084h), 2016-01-01
Supplement: c6ra10084h1.pdf [file c6ra10084h1.pdf]

## Supporting information (SI)

### **Thermally stable ferrocene- $\alpha$ -cyanostilbenes as efficient materials for second order nonlinear optical polarizability**

*Sugandha Dhoun, † Griet Depotter, ‡ Sarbjeet Kaur, † Paramjit Kaur, \* † Koen Clays ‡ and Kamaljit Singh<sup>\*, †, †</sup>.*

<sup>†</sup>Department of Chemistry, UGC-Centre of Advance Study-II, Guru Nanak Dev University, Amritsar-143005, India.

<sup>‡</sup>Department of Chemistry, University of Leuven, Celestijnenlaan 200D, B-3001 Leuven, Belgium.

\* Email: kamaljit.chem@gndu.ac.in; paramjit19in@yahoo.co.in.

---

<sup>†</sup>The first two authors contributed equally.

| Sr. No. | Content                                                                                                                                                                | Page number |
|---------|------------------------------------------------------------------------------------------------------------------------------------------------------------------------|-------------|
| 1.      | <b>Figure S1:</b> Thermogravimetric (TGA) curves of chromophores <b>4-8</b> .                                                                                          | S5          |
| 2.      | <b>Figure S2:</b> UV-visible absorption spectra of chromophore <b>4</b> recorded at $1 \times 10^{-5}$ M in dichloromethane and the resolved peaks after band fitting. | S6          |
| 3.      | <b>Figure S3:</b> UV-visible absorption spectra of chromophore <b>5</b> recorded at $1 \times 10^{-5}$ M in dichloromethane and the resolved peaks after band fitting. | S7          |
| 4.      | <b>Figure S4:</b> UV-visible absorption spectra of chromophore <b>6</b> recorded at $1 \times 10^{-5}$ M in dichloromethane and the resolved peaks after band fitting  | S8          |
| 5.      | <b>Figure S5:</b> UV-visible absorption spectra of chromophore <b>7</b> recorded at $1 \times 10^{-5}$ M in dichloromethane and the resolved peaks after band fitting  | S9          |
| 6.      | <b>Figure S6:</b> UV-visible absorption spectra of chromophore <b>8</b> recorded at $1 \times 10^{-5}$ M in dichloromethane and the resolved peaks after band fitting  | S10         |
| 7.      | <b>Figure S7:</b> Emission spectra of <b>4</b> at $1 \times 10^{-5}$ in DCM at $\lambda_{\text{ex}} = 352$ nm.                                                         | S11         |
| 8.      | <b>Figure S7a :</b> Emission spectra of <b>4</b> at $1 \times 10^{-5}$ in DCM at $\lambda_{\text{ex}} = 476$ nm                                                        | S11         |
| 9.      | <b>Figure S8:</b> Emission spectra of <b>5</b> at $1 \times 10^{-5}$ in DCM at $\lambda_{\text{ex}} = 356$ nm.                                                         | S12         |
| 10.     | <b>Figure S8a :</b> Emission spectra of <b>5</b> at $1 \times 10^{-5}$ in DCM at $\lambda_{\text{ex}} = 474$ nm.                                                       | S12         |
| 11.     | <b>Figure S9:</b> Emission spectra of <b>6</b> at $1 \times 10^{-5}$ in DCM at $\lambda_{\text{ex}} = 356$ nm.                                                         | S13         |
| 12.     | <b>Figure S9a :</b> Emission spectra of <b>6</b> at $1 \times 10^{-5}$ in DCM at $\lambda_{\text{ex}} = 476$ nm.                                                       | S13         |
| 13.     | <b>Figure S10:</b> Emission spectra of <b>7</b> at $1 \times 10^{-5}$ in DCM at $\lambda_{\text{ex}} = 362$ nm.                                                        | S14         |
| 14.     | <b>Figure S10a :</b> Emission spectra of <b>7</b> at $1 \times 10^{-5}$ in DCM at $\lambda_{\text{ex}} = 466$ nm.                                                      | S14         |
| 15.     | <b>Figure S11:</b> Emission spectra of <b>8</b> at $1 \times 10^{-5}$ in DCM at $\lambda_{\text{ex}} = 364$ nm.                                                        | S15         |
| 16.     | <b>Figure S11a :</b> Emission spectra of <b>8</b> at $1 \times 10^{-5}$ in DCM at $\lambda_{\text{ex}} = 460$ nm.                                                      | S15         |
| 17.     | <b>Table S1:</b> Quantum yield of the chromophores <b>4-8</b> .                                                                                                        | S16         |
| 18.     | <b>Figure S12:</b> Linear correlation of absorbance and concentration of chromophore <b>6</b> at 362 nm.                                                               | S16         |
| 19.     | <b>Figure S13:</b> Electron density maps generated from Gauss view with structural models superimposed.                                                                | S17         |
| 20.     | <b>Figure S14:</b> Spectro-electrochemical curve of chromophore <b>4</b> recorded at $5 \times 10^{-5}$ M in dichloromethane and the resolved peak after band fitting. | S18         |

|     |                                                                                                                                                                                                                                                              |         |
|-----|--------------------------------------------------------------------------------------------------------------------------------------------------------------------------------------------------------------------------------------------------------------|---------|
| 21. | <b>Figure S15:</b> Spectro-electrochemical curve of chromophore <b>5</b> recorded at $5 \times 10^{-5}$ M in dichloromethane and the resolved peak after band fitting.                                                                                       | S18     |
| 22. | <b>Figure S16:</b> Spectro-electrochemical curve of chromophore <b>6</b> recorded at $5 \times 10^{-5}$ M in dichloromethane and the resolved peak after band fitting.                                                                                       | S19     |
| 23. | <b>Figure S17a:</b> Spectro-electrochemical curve of chromophore <b>7</b> recorded at $5 \times 10^{-5}$ M in dichloromethane and the resolved peak after band fitting.                                                                                      | S19     |
| 24. | <b>Figure S17b:</b> Spectro-electrochemical curve of chromophore <b>8</b> recorded at $5 \times 10^{-5}$ M in dichloromethane and the resolved peak after band fitting.                                                                                      | S20     |
| 25. | <b>Table S2:</b> Comparison of experimentally (UV) and theoretically (TD-DFT) calculated HOMO- LUMO Energy data and the transitions.                                                                                                                         | S20     |
| 26. | <b>Table S3:</b> UV-visible absorption data of <b>4-8</b> in various solvents.                                                                                                                                                                               | S21     |
| 27. | <b>Figure S18:</b> Cyclic voltammogram of <b>4</b> ( $1 \times 10^{-4}$ M in dichloromethane).                                                                                                                                                               | S22     |
| 28. | <b>Figure S19:</b> Cyclic voltammogram of <b>5</b> ( $1 \times 10^{-4}$ M in dichloromethane).                                                                                                                                                               | S22     |
| 29. | <b>Figure S20:</b> Cyclic voltammogram of <b>6</b> ( $1 \times 10^{-4}$ M in dichloromethane).                                                                                                                                                               | S23     |
| 30. | <b>Figure S21:</b> Cyclic voltammogram of <b>7</b> ( $1 \times 10^{-4}$ M in dichloromethane).                                                                                                                                                               | S23     |
| 31. | <b>Figure S22:</b> Cyclic voltammogram of <b>8</b> ( $1 \times 10^{-4}$ M in dichloromethane).                                                                                                                                                               | S24     |
| 32. | <b>Table S4:</b> Energies of the Frontier Orbitals HOMO-n to LUMO+n (n=0, 1, 2,3,4,5 & 6) obtained from TD-DFT carried out at B3LYP/6-31G level in dichloromethane as solvent medium.                                                                        | S25     |
| 33. | <b>Table S5:</b> Energies of the Frontier Orbitals HOMO-n to LUMO+n (n=0, 1, 2,3,4,5 & 6) obtained from TD-DFT carried out at B3LYP/6-31G level in gas phase.                                                                                                | S26     |
| 34. | <b>Figure S23:</b> B3LYP/6-31G predicted energy level diagram for the chromophores <b>4-8</b> .                                                                                                                                                              | S27     |
| 35. | <b>Figure S24:</b> Contour Surfaces of frontier molecular orbitals involved in electronic transitions of the HE bands of the chromophores <b>4-6</b> , obtained from TD-DFT calculations using dichloromethane as solvent at an isosurface value of 0.02 au. | S28     |
| 36. | <b>Figure S25:</b> Contour Surfaces of frontier molecular orbitals involved in electronic transitions of the HE bands of the chromophores <b>7-8</b> , obtained from TD-DFT calculations using dichloromethane as solvent at an isosurface value of 0.02 au. | S28     |
| 37. | <b>Table S6:</b> Cartesian coordinates from the optimized structure of <b>4</b> at B3LYP/6-31G                                                                                                                                                               | S29-S30 |
| 38. | <b>Table S7:</b> Cartesian coordinates from the optimized structure of <b>5</b> at                                                                                                                                                                           | S31-S32 |

|     |                                                                                                 |         |
|-----|-------------------------------------------------------------------------------------------------|---------|
|     | B3LYP/6-31G                                                                                     |         |
| 39. | <b>Table S8:</b> Cartesian coordinates from the optimized structure of <b>6</b> at B3LYP/6-31G  | S33-S35 |
| 40. | <b>Table S9:</b> Cartesian coordinates from the optimized structure of <b>7</b> at B3LYP/6-31G  | S35-S37 |
| 41. | <b>Table S10:</b> Cartesian coordinates from the optimized structure of <b>8</b> at B3LYP/6-31G | S37-S40 |
| 42. | <b>Figure S26:</b> <sup>1</sup> H NMR (CDCl <sub>3</sub> ) of <b>4</b> .                        | S41     |
| 43. | <b>Figure S27:</b> <sup>13</sup> C NMR (CDCl <sub>3</sub> ) of <b>4</b> .                       | S42     |
| 44. | <b>Figure S28:</b> <sup>1</sup> H NMR (CDCl <sub>3</sub> ) of <b>5</b> .                        | S43     |
| 45. | <b>Figure S29:</b> <sup>13</sup> C NMR (CDCl <sub>3</sub> ) of <b>5</b> .                       | S44     |
| 46. | <b>Figure S30:</b> <sup>1</sup> H NMR (CDCl <sub>3</sub> ) of <b>6</b> .                        | S45     |
| 47. | <b>Figure S31:</b> <sup>13</sup> C NMR (CDCl <sub>3</sub> ) of <b>6</b> .                       | S46     |
| 48. | <b>Figure S32:</b> <sup>1</sup> H NMR (CDCl <sub>3</sub> ) of <b>7</b> .                        | S47     |
| 49. | <b>Figure S33:</b> <sup>13</sup> C NMR (CDCl <sub>3</sub> ) of <b>7</b> .                       | S48     |
| 50. | <b>Figure S34:</b> <sup>1</sup> H NMR (CDCl <sub>3</sub> ) of <b>8</b> .                        | S49     |
| 51. | <b>Figure S35:</b> <sup>13</sup> C NMR (CDCl <sub>3</sub> ) of <b>8</b> .                       | S50     |
| 52. | <b>Complete reference 61</b>                                                                    | S51     |

## Thermogravimetric Curves

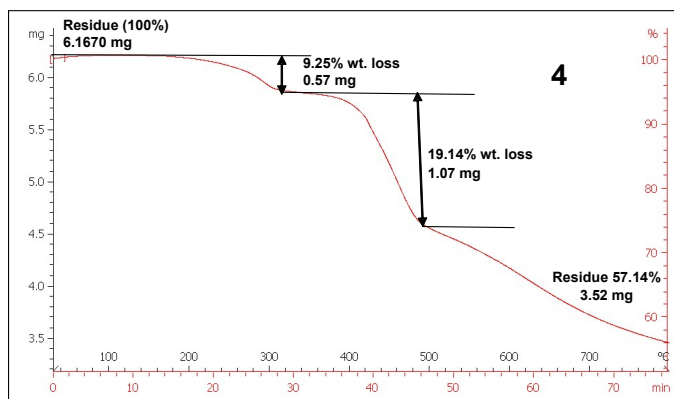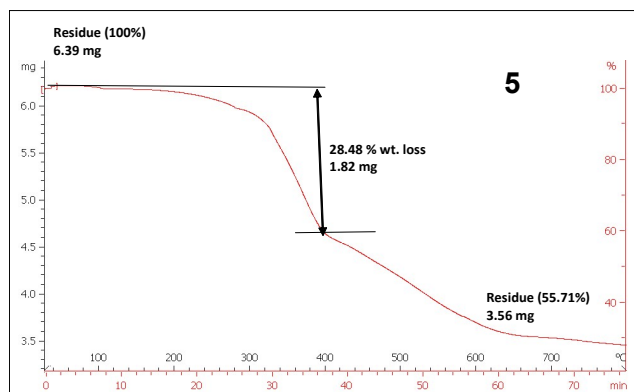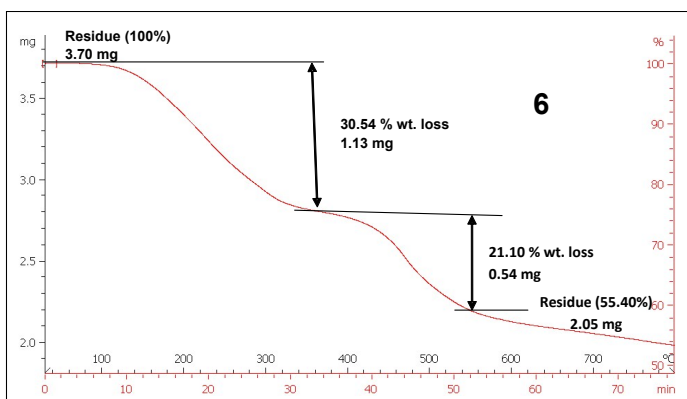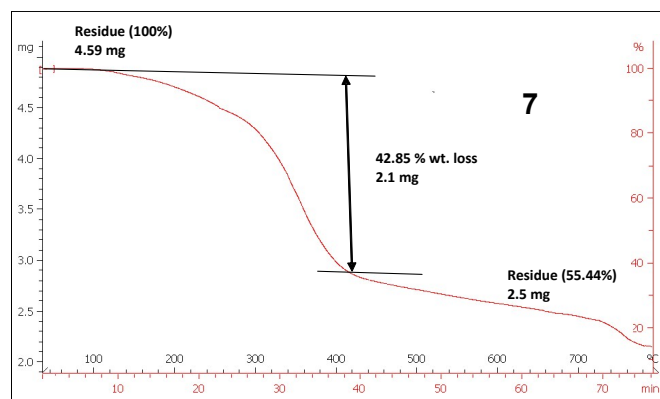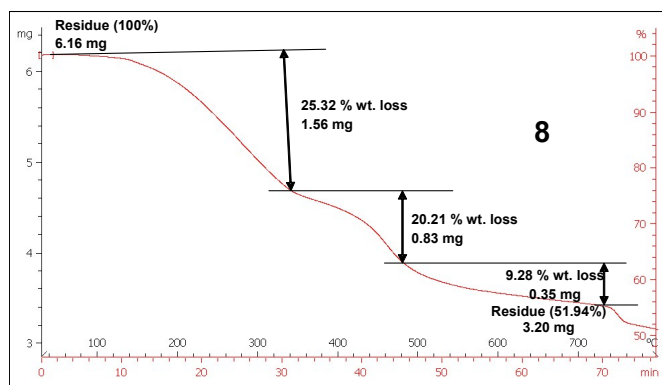

Figure S1: Thermogravimetric (TGA) curves of chromophores 4-8.

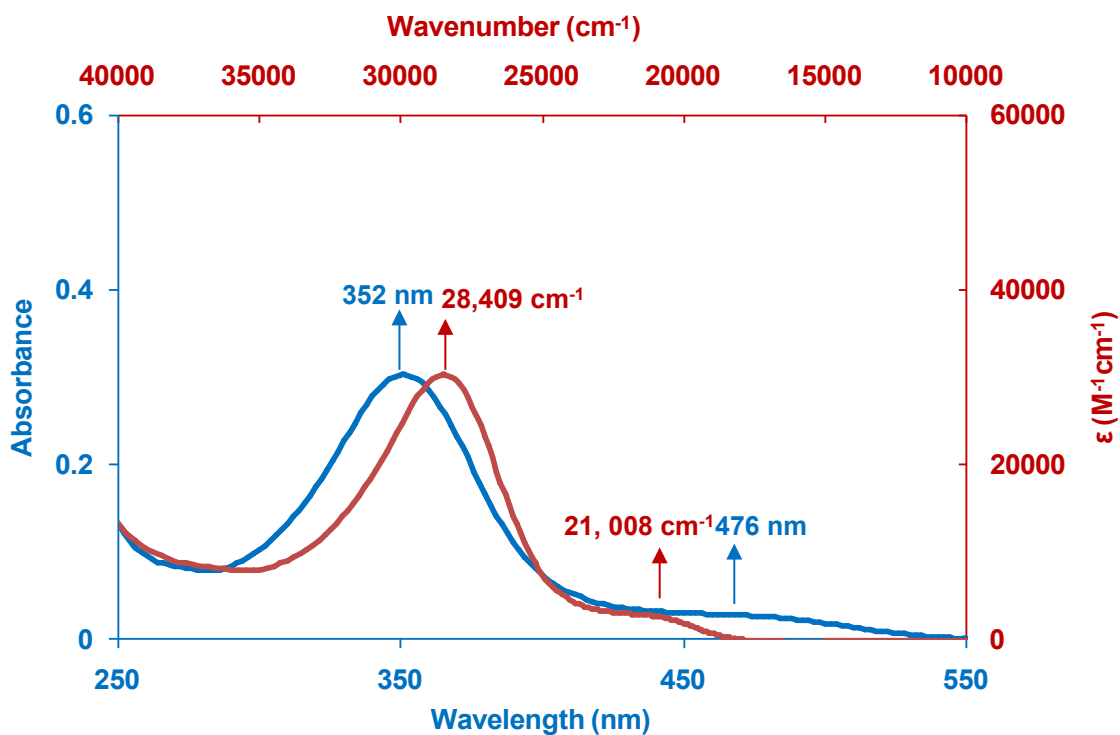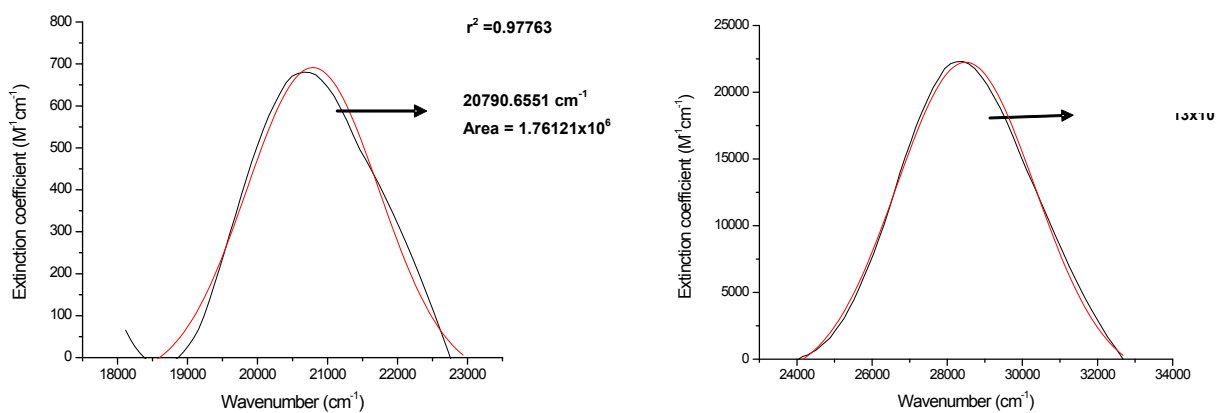

**Figure S2:** UV-Visible absorption spectra of chromophore **4** recorded at  $1 \times 10^{-5}$  M in dichloromethane and the resolved peaks after band fitting (Black lines: experimental data, Red line: fitted by the software).

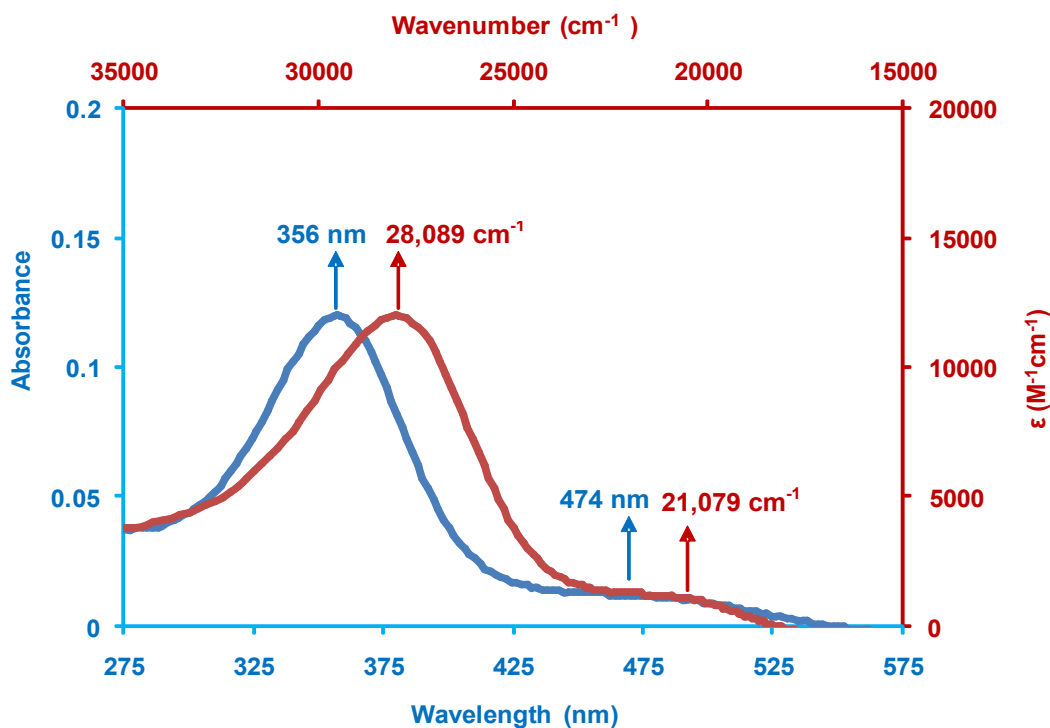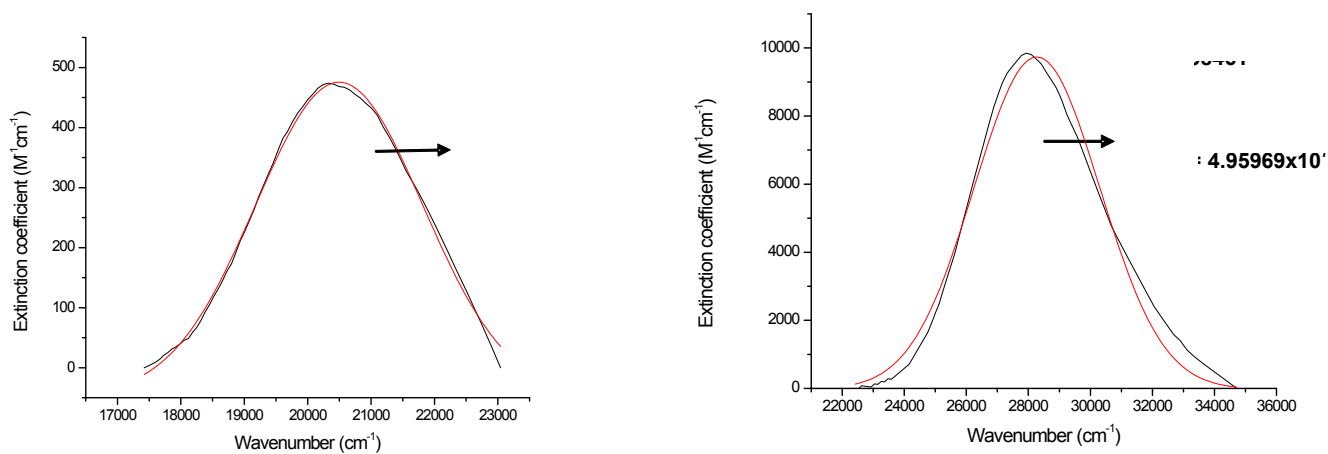

**Figure S3:** UV-Visible absorption spectra of chromophore **5** recorded at  $1 \times 10^{-5}$  M in dichloromethane and the resolved peaks after band fitting (Black lines: experimental data, Red line: fitted by the software).

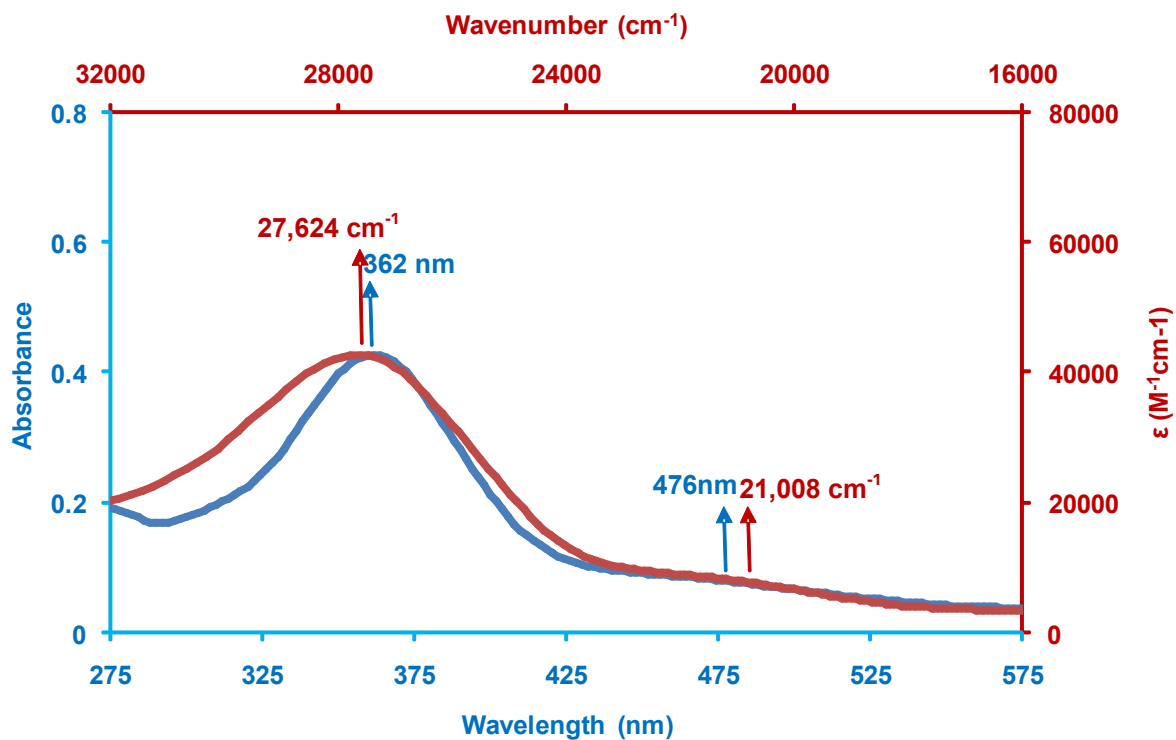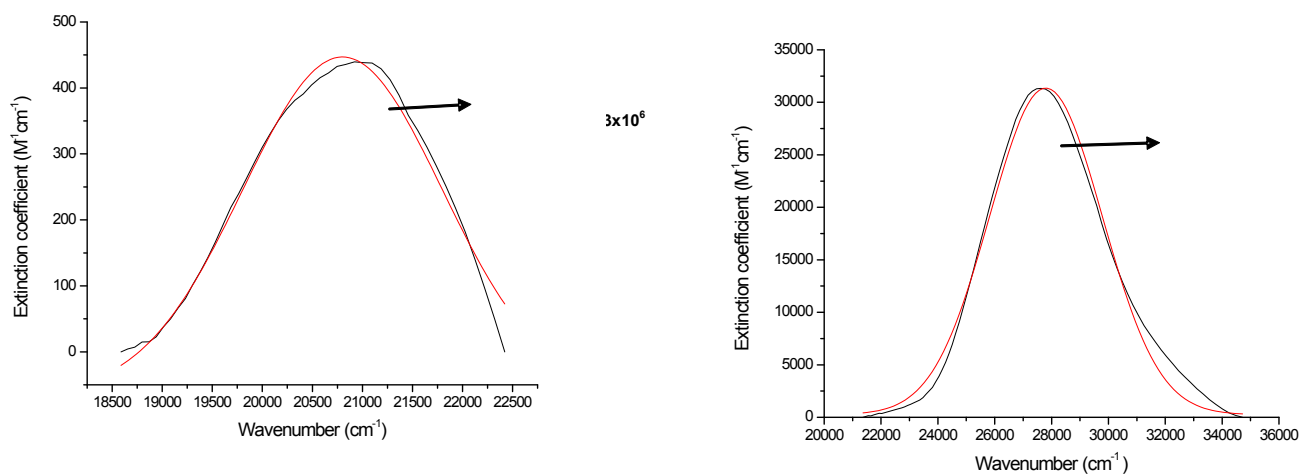

**Figure S4:** UV-Visible absorption spectra of chromophore **6** recorded at  $1 \times 10^{-5} M$  in dichloromethane and the resolved peaks after band fitting (Black lines: experimental data, Red line: fitted by the software).



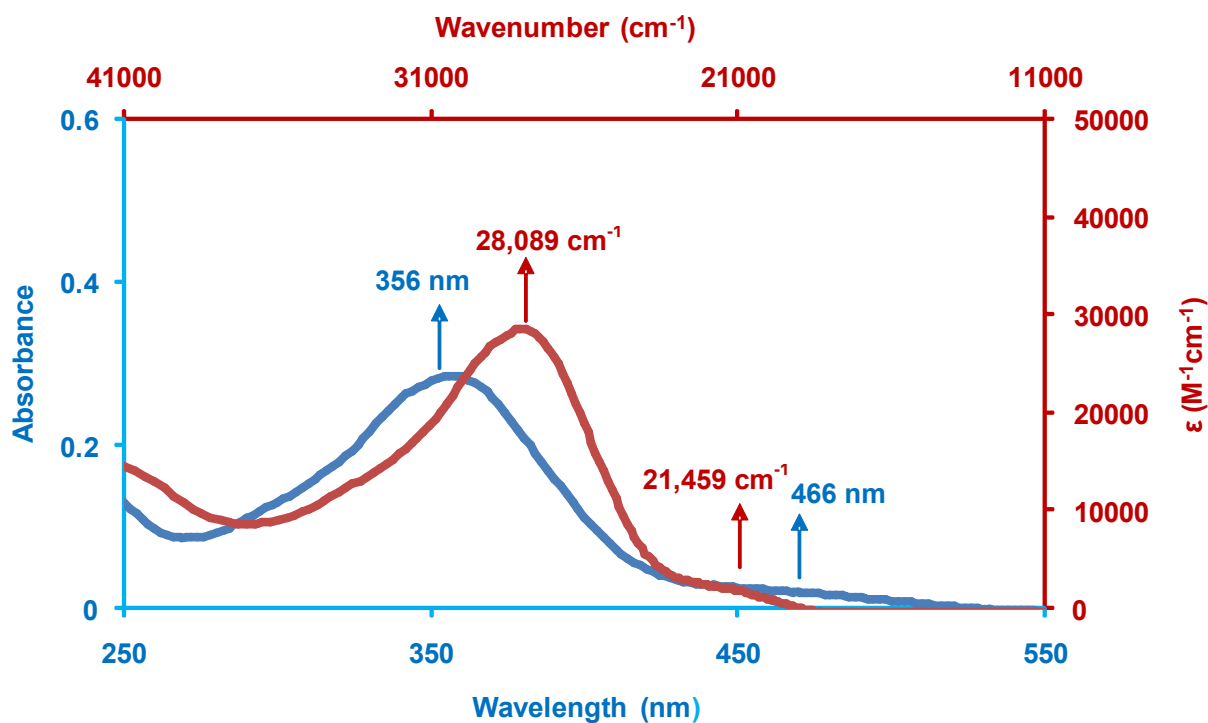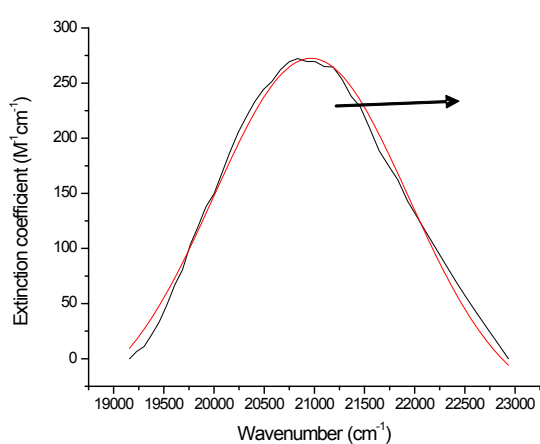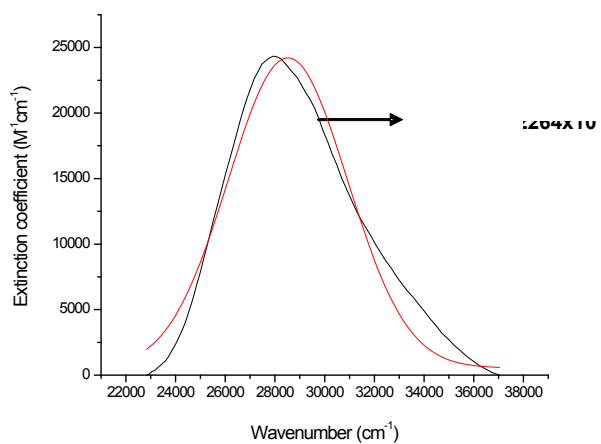

**Figure S5:** UV-Visible absorption spectra of chromophore 7 recorded at  $1 \times 10^{-5}$  M in dichloromethane and the resolved peaks after band fitting (Black lines: experimental data, Red line: fitted by the software).

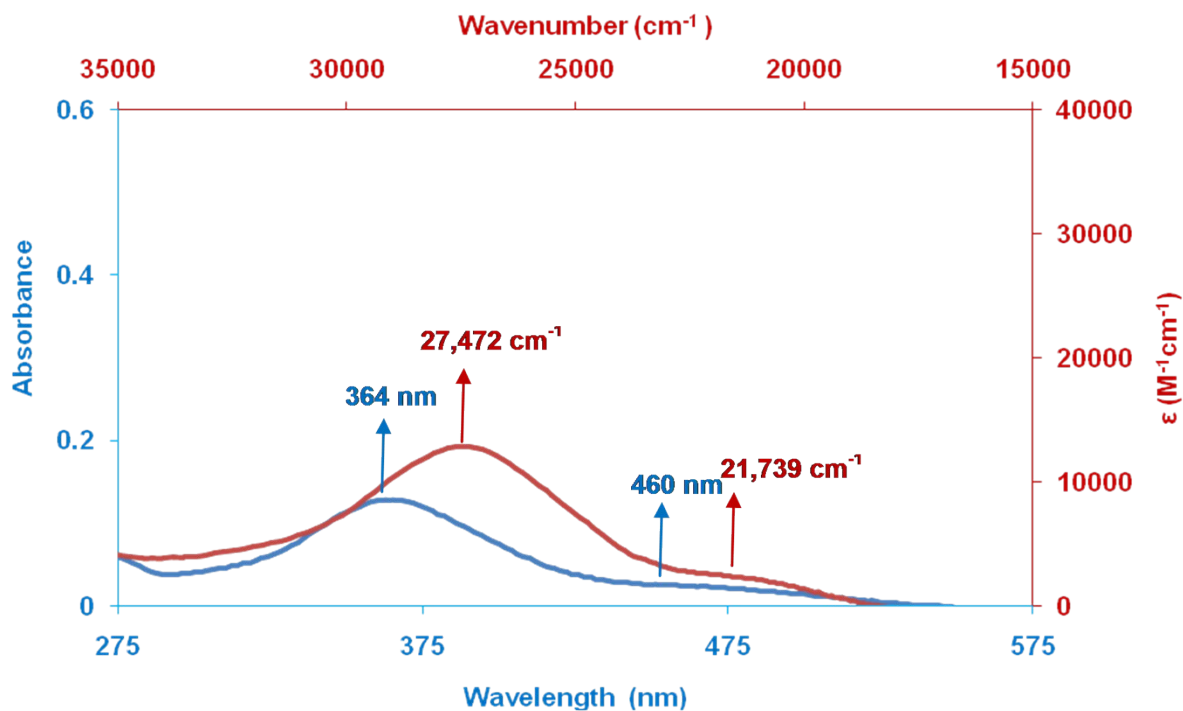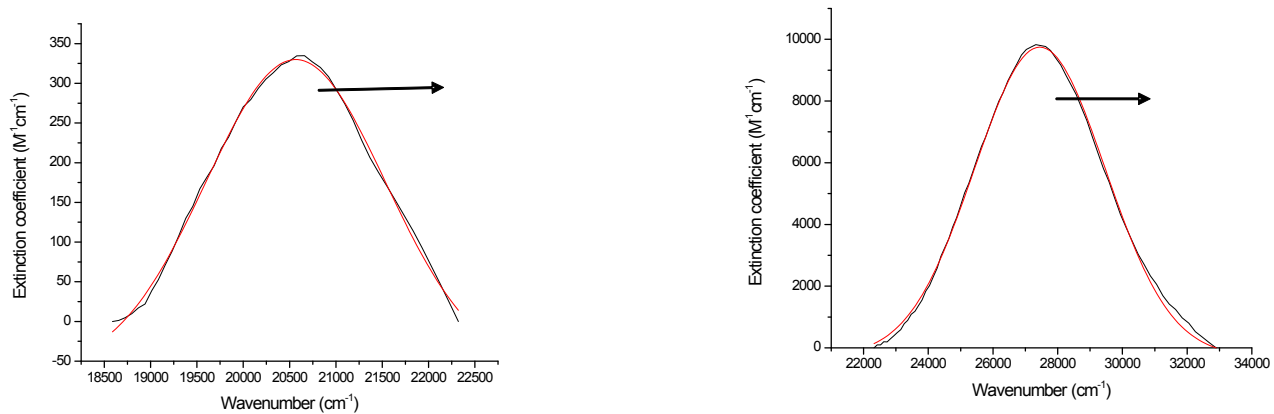

**Figure S6:** UV- Visible absorption spectra of chromophore **8** recorded at  $1 \times 10^{-5}$  M in dichloromethane and the resolved peaks after band fitting. (Black lines: experimental data, Red line: fitted by the software).

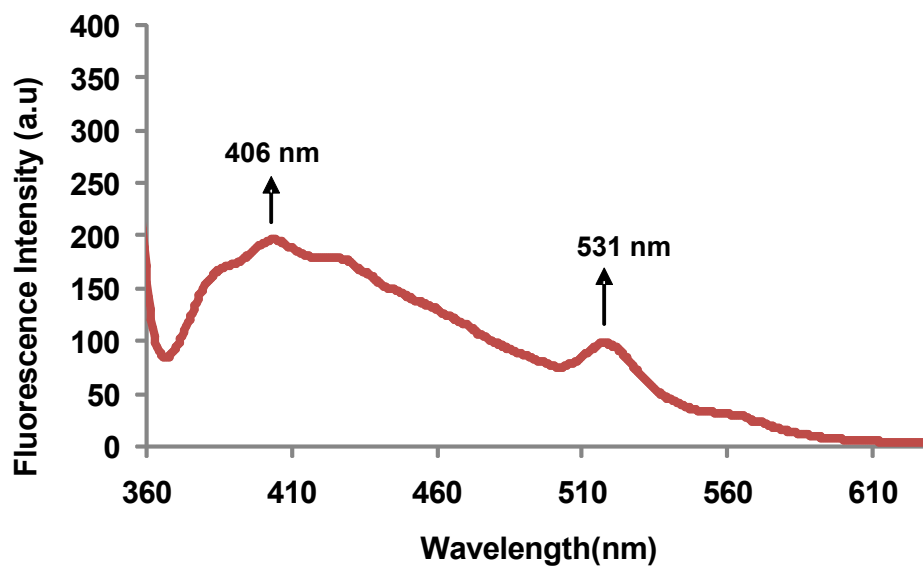

Figure S7: Emission spectra of **4** at  $1 \times 10^{-5}$  in DCM at  $\lambda_{\text{ex}} = 352$  nm.

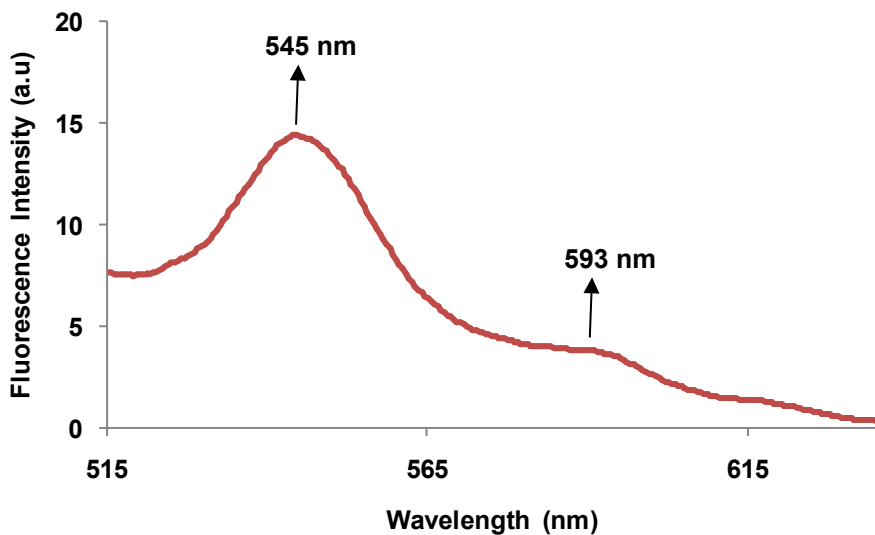

Figure S7a : Emission spectra of **4** at  $1 \times 10^{-5}$  in DCM at  $\lambda_{\text{ex}} = 476$  nm.

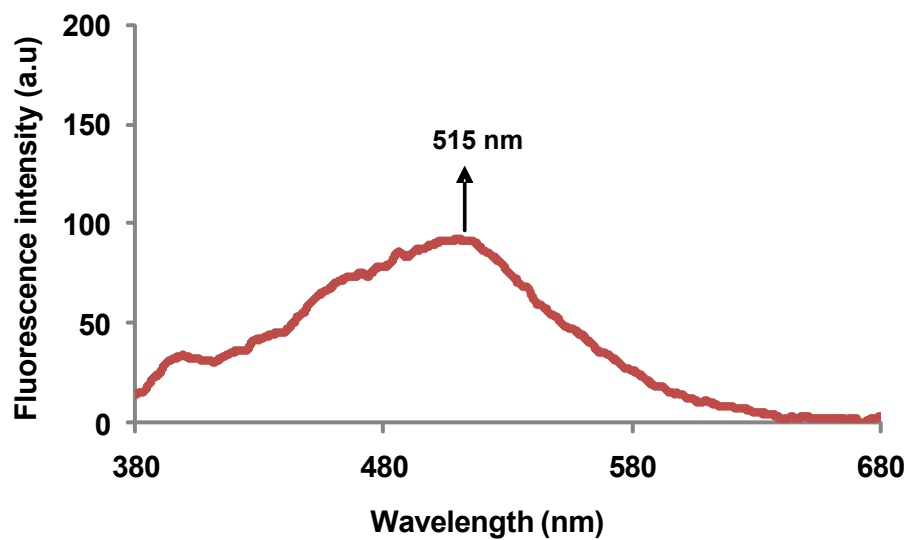

**Figure S8:** Emission spectra of **5** at  $1 \times 10^{-5}$  in DCM at  $\lambda_{\text{ex}} = 356$  nm.

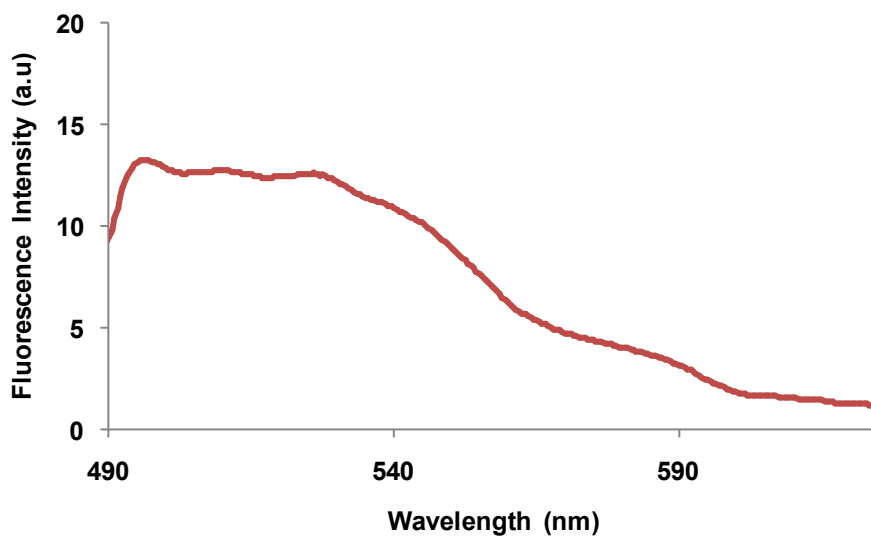

**Figure S8a :** Emission spectra of **5** at  $1 \times 10^{-5}$  in DCM at  $\lambda_{\text{ex}} = 474$  nm.

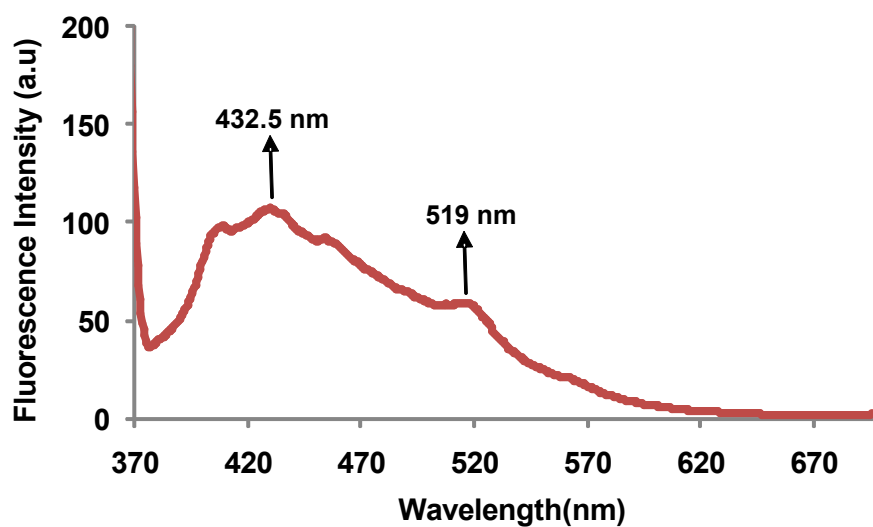

**Figure S9:** Emission spectra of **6** at  $1 \times 10^{-5}$  in DCM at  $\lambda_{\text{ex}} = 362$  nm.

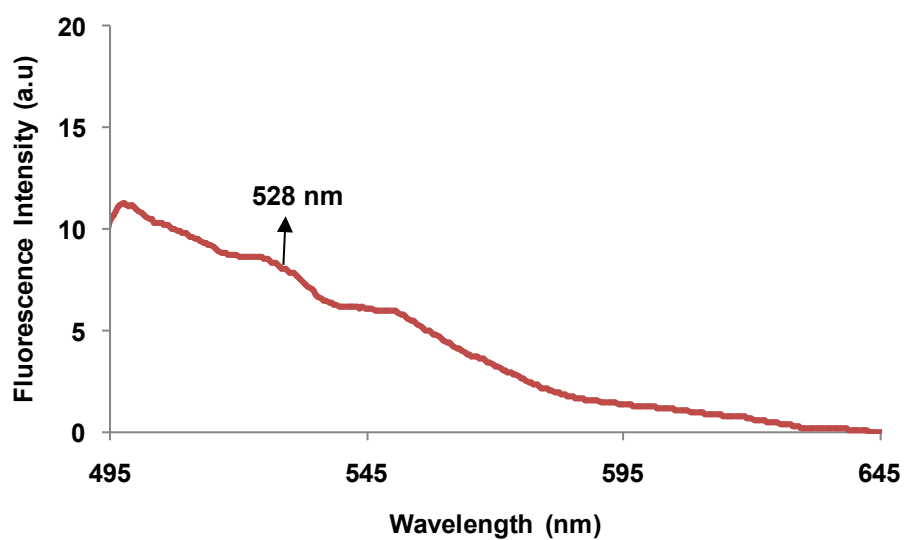

**Figure S9a :** Emission spectra of **6** at  $1 \times 10^{-5}$  in DCM at  $\lambda_{\text{ex}} = 476$  nm.

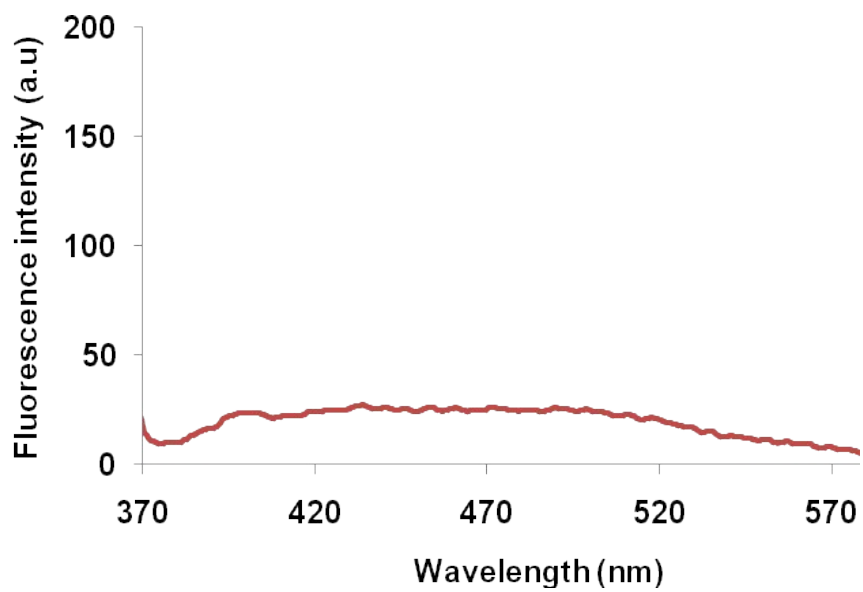

**Figure S10:** Emission spectra of **7** at  $1 \times 10^{-5}$  in DCM at  $\lambda_{\text{ex}} = 356$  nm.

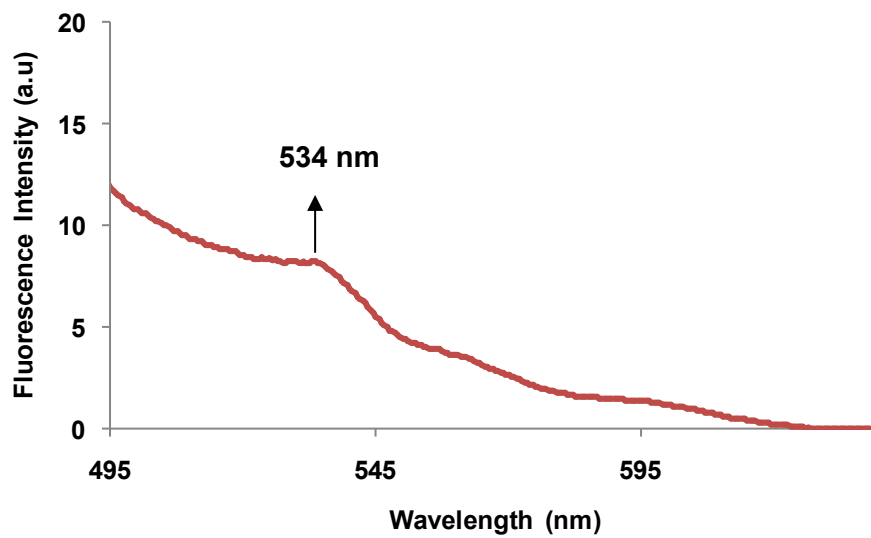

**Figure S10a :** Emission spectra of **7** at  $1 \times 10^{-5}$  in DCM at  $\lambda_{\text{ex}} = 466$  nm.

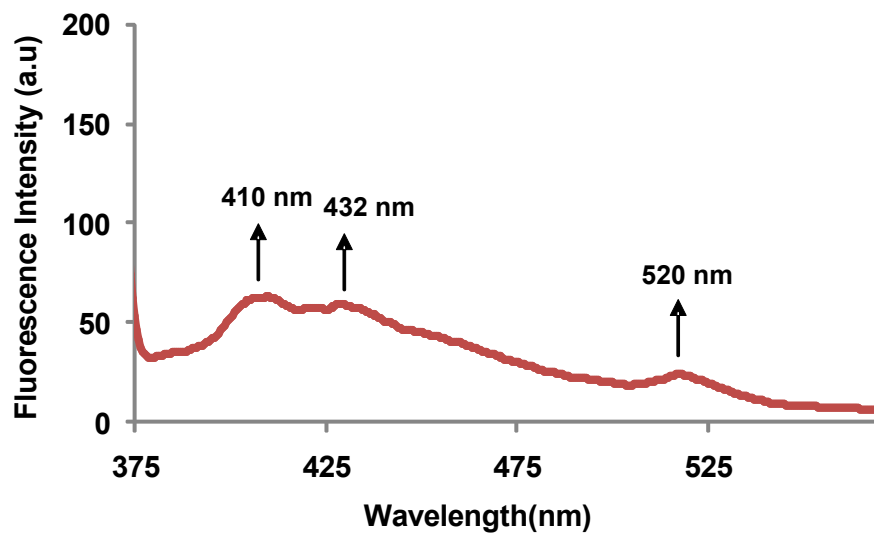

Figure S11: Emission spectra of **8** at  $1 \times 10^{-5}$  in DCM at  $\lambda_{\text{ex}} = 364$  nm

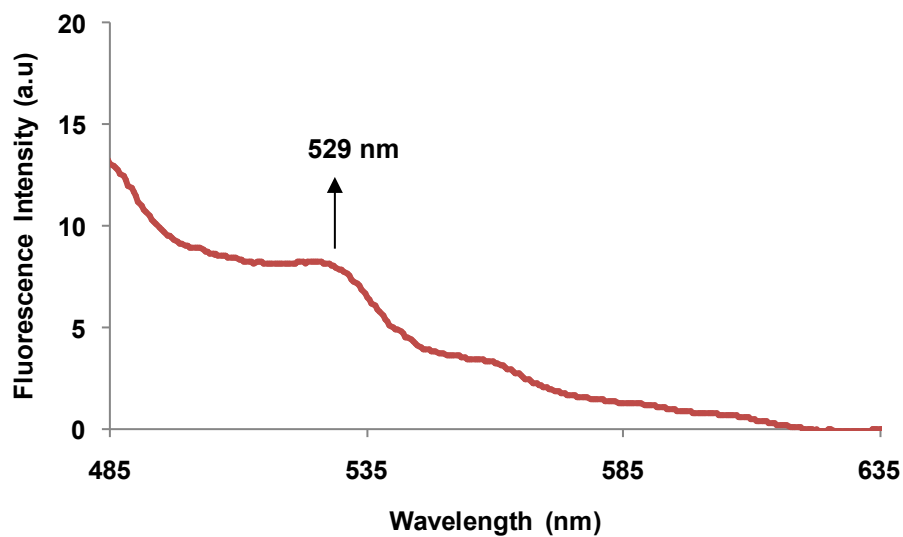

Figure S11a : Emission spectra of **8** at  $1 \times 10^{-5}$  in DCM at  $\lambda_{\text{ex}} = 460$  nm

**Table S1:** Quantum yield of the chromophores 4-8.

| Chromophores | Quantum yield ( $\Phi_f$ ) |         |
|--------------|----------------------------|---------|
|              | HE band                    | LE band |
| 4            | 0.1324                     | 0.0309  |
| 5            | 0.1423                     | 0.0519  |
| 6            | 0.0580                     | 0.0084  |
| 7            | 0.0233                     | 0.0295  |
| 8            | 0.0668                     | 0.0264  |

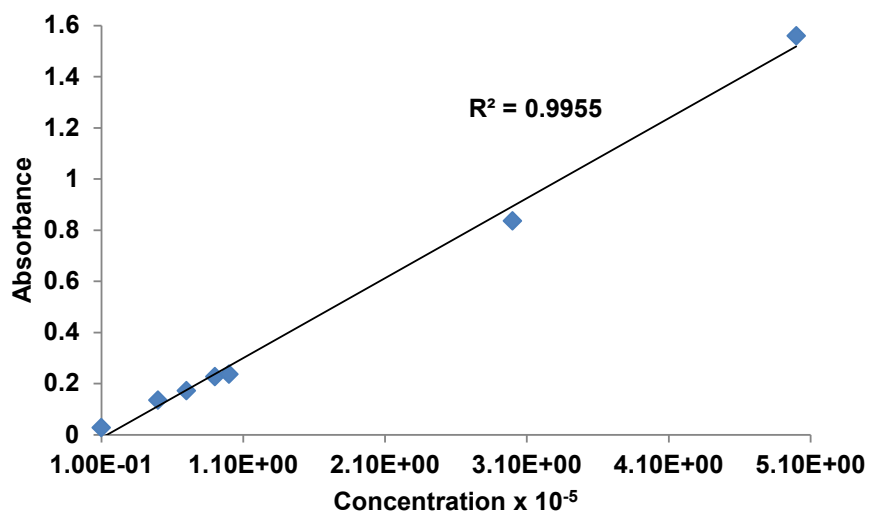

**Figure S12:** Linear correlation of absorbance and concentration of chromophore 6 at 362 nm.



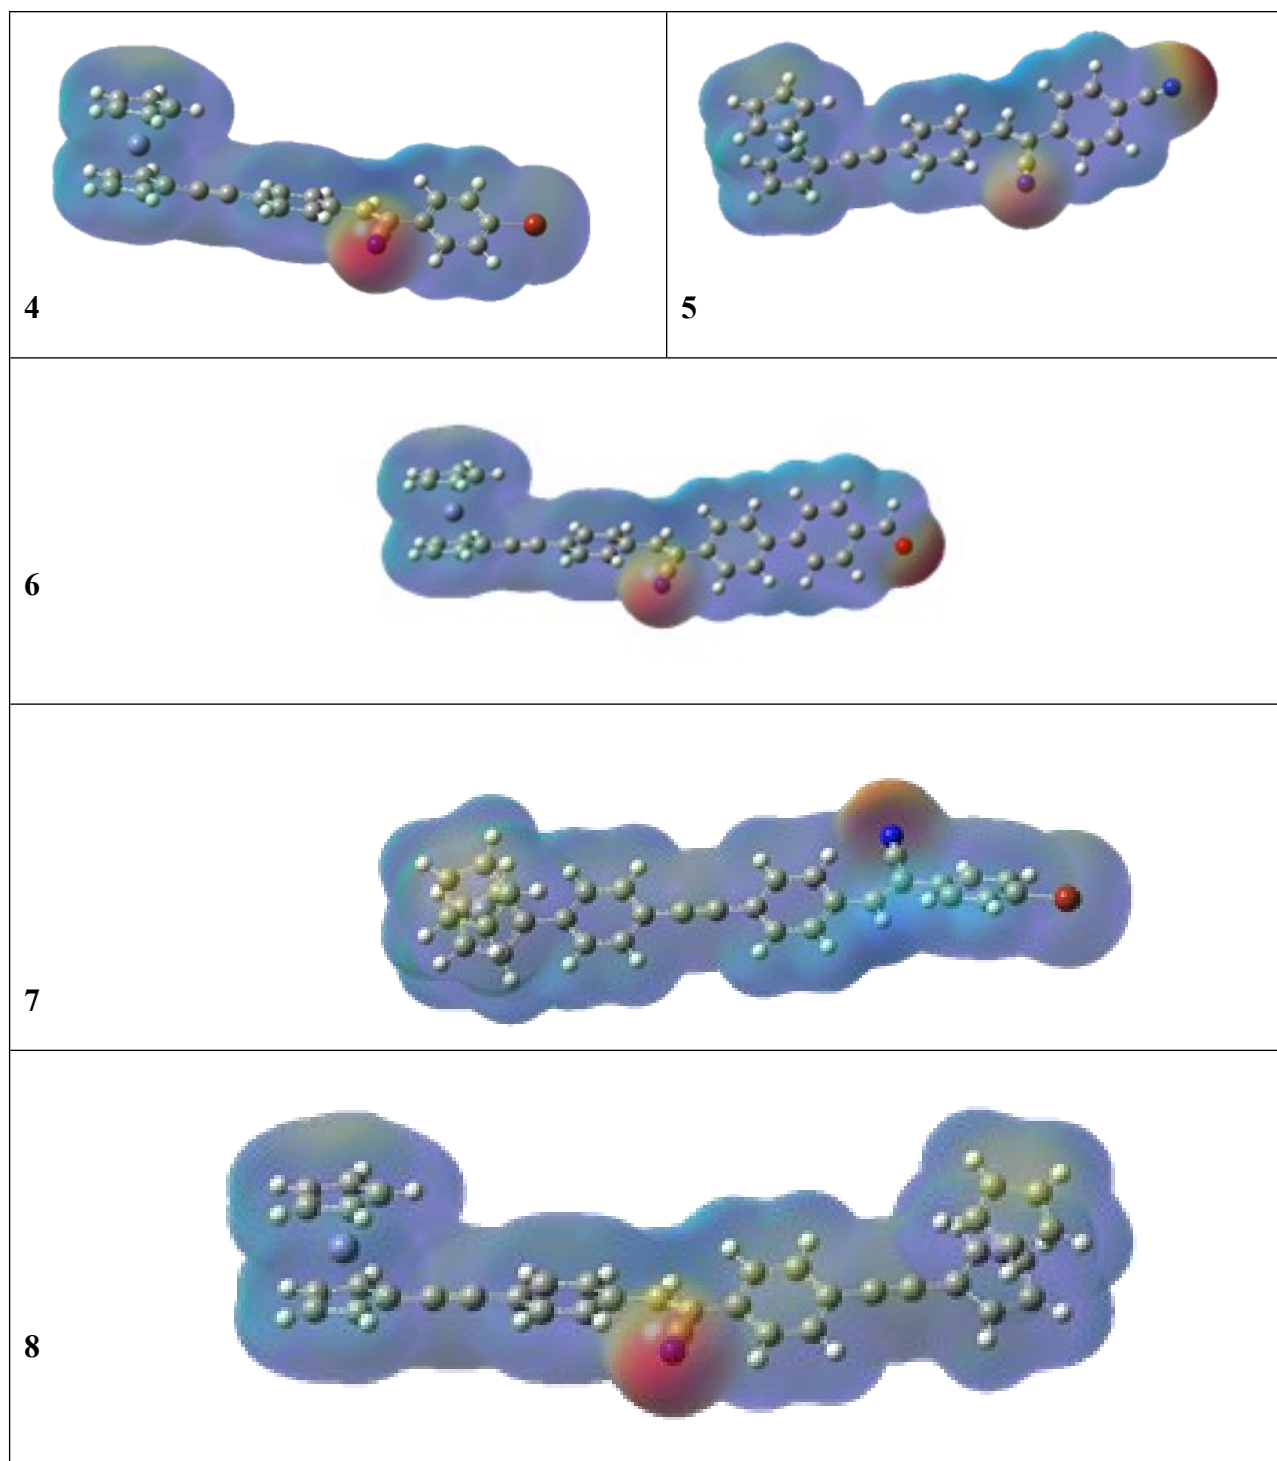

**Figure S13:** Electron density maps of **4-8** generated from Gauss view 5.09, with isovalue of 0.0004 with structural models superimposed.

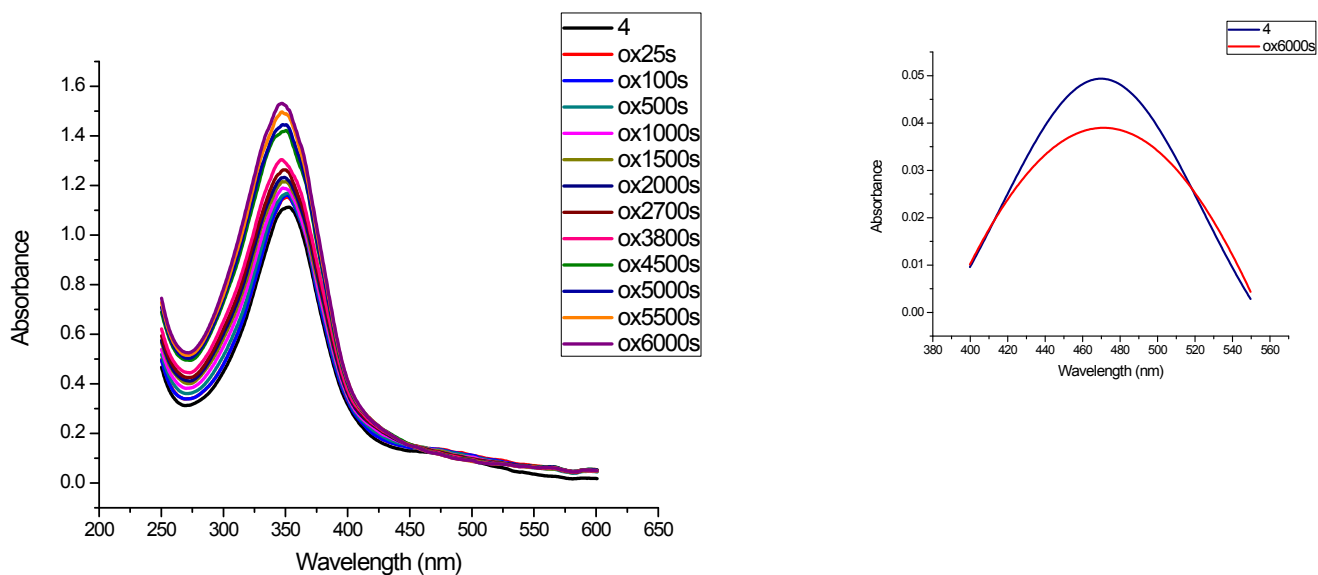

**Figure S14:** Spectro-electrochemical curve of chromophore **4** recorded at  $5 \times 10^{-5}$  M in dichloromethane and the resolved peak after band fitting.

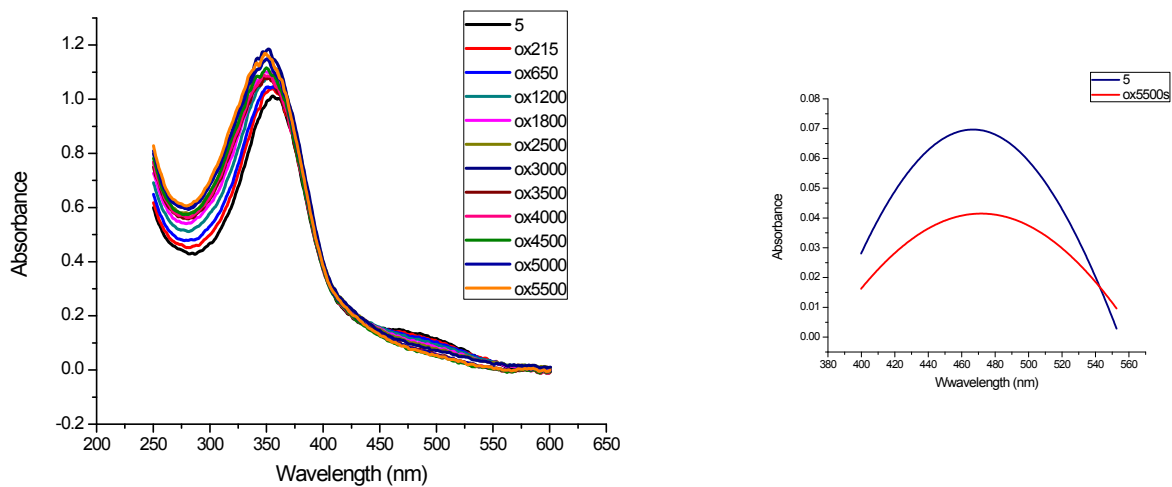

**Figure S15:** Spectro-electrochemical curve of chromophore **5** recorded at  $5 \times 10^{-5}$  M in dichloromethane and the resolved peak after band fitting.

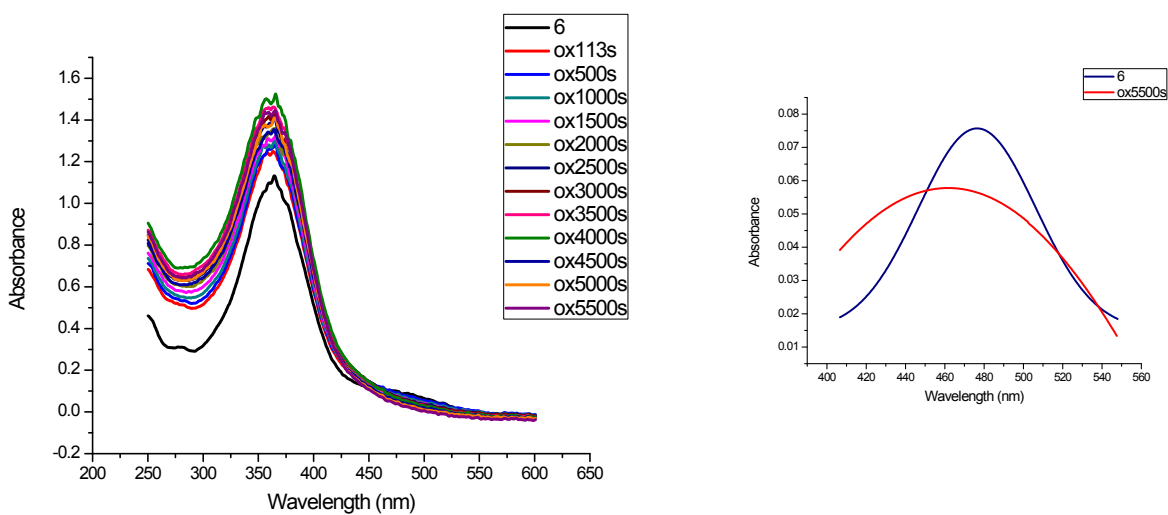

**Figure S16:** Spectro-electrochemical curve of chromophore **6** recorded at  $5 \times 10^{-5}$  M in dichloromethane and the resolved peak after band fitting.

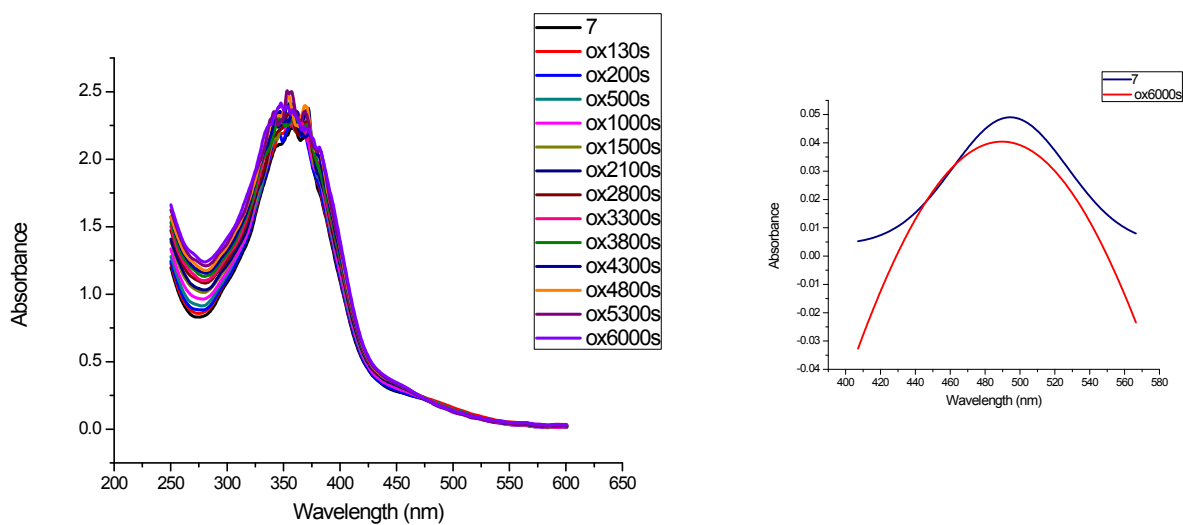

**Figure S17a:** Spectro-electrochemical curve of chromophore **7** recorded at  $5 \times 10^{-5}$  M in dichloromethane and the resolved peak after band fitting.

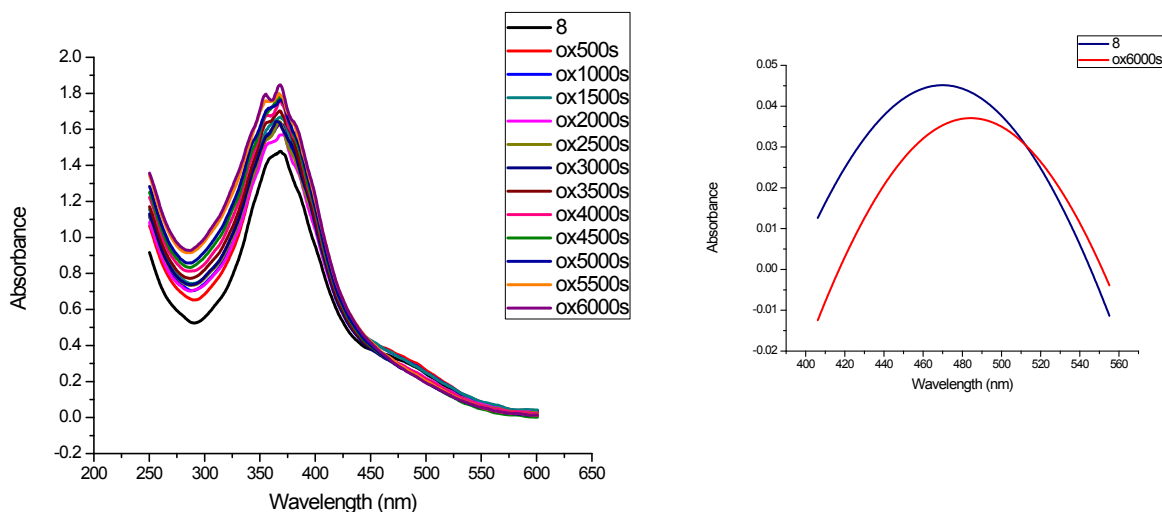

**Figure S17b:** Spectro-electrochemical curve of chromophore **8** recorded at  $5 \times 10^{-5}$  M in dichloromethane and the resolved peak after band fitting.

**Table S2:** Comparison of experimentally (UV-visible) and theoretically (TD-DFT) calculated HOMO-LUMO energy data and the transitions.

| Compound | Transition | CI coefficient | E(eV)/ $\lambda_{\text{theor}}^b$<br>in nm | Oscillator strength | Assignment              | $\lambda_{\text{exp}}^a$ in nm |
|----------|------------|----------------|--------------------------------------------|---------------------|-------------------------|--------------------------------|
| <b>4</b> | H-2→L      | 0.65719(86%)   | 3.0852/381.77                              | 1.1149              | $\pi \rightarrow \pi^*$ | 352                            |
|          | H-3→L+1    | 0.30288(18%)   | 2.4087/488.99                              | 0.0299              | MLCT                    | 476                            |
| <b>5</b> | H-2→L      | 0.67906(92%)   | 2.9924/393.61                              | 1.1710              | $\pi \rightarrow \pi^*$ | 356                            |
|          | H→L        | 0.56993(65%)   | 2.6477/444.85                              | 0.3743              | MLCT                    | 474                            |
| <b>6</b> | H-2→L      | 0.67004(90%)   | 2.9912/393.76                              | 1.2090              | $\pi \rightarrow \pi^*$ | 362                            |
|          | H-4→L+2    | -0.25644(13%)  | 2.4082/489.09                              | 0.0451              | MLCT, d→d               | 476                            |
| <b>7</b> | H-2→L      | 0.69144(96%)   | 2.9236/402.87                              | 1.3329              | $\pi \rightarrow \pi^*$ | 356                            |
|          | H-1→L+5    | -0.24486(12%)  | 2.4215/486.40                              | 0.0547              | MLCT, d→d               | 466                            |
| <b>8</b> | H→L        | 0.64925 (84%)  | 2.7485/428.53                              | 1.0479              | $\pi \rightarrow \pi^*$ | 364                            |
|          | H-6→L+1    | -0.24771 (13%) | 2.4264/482.44                              | 0.0147              | MLCT                    | 460                            |
|          | H-6→L+7    | -0.34738 (23%) | 2.4264/482.44                              | 0.0147              | d→d                     | 460                            |

<sup>a</sup> recorded at  $1 \times 10^{-5}$  M in dichloromethane. <sup>b</sup> Calculated from TD-DFT using B3LYP/6-31G and applying correction factor of 0.95.

where, M- Metal, L- Ligand, A- Acceptor, D- Donor.

**Table S3:** UV-visible absorption data of **4-8** in various solvents.

| <b>Solvent</b>  | <b>Hexane</b> | <b>Toluene</b> | <b>Diethyl</b> | <b>DCM</b>     | <b>THF</b>     | <b>Methanol</b> | <b>ACN</b> | <b>DMF</b>     | <b>DMSO</b>    |
|-----------------|---------------|----------------|----------------|----------------|----------------|-----------------|------------|----------------|----------------|
| <b>Compound</b> | <b>ether</b>  |                |                |                |                |                 |            |                |                |
| 4               | 348           | 352<br>(26800) | 348            | 352<br>(30300) | 350<br>(15300) | 346             | 346        | 350<br>(30500) | 352<br>(34100) |
|                 | 470           | 474<br>(3100)  | 472            | 476<br>(2700)  | 472<br>(1700)  | 470             | 470        | 474<br>(2800)  | 476<br>(3500)  |
| 5               | 352           | 356<br>(18400) | 352            | 356<br>(12000) | 354<br>(23300) | 350             | 348        | 352<br>(19800) | 354<br>(27700) |
|                 | 476           | 474<br>(2600)  | 470            | 474<br>(1200)  | 472<br>(2800)  | 470             | 468        | 472<br>(2700)  | 473<br>(2100)  |
| 6               | 356           | 364<br>(33800) | 358            | 362<br>(42600) | 362<br>(24500) | –               | 356        | 362<br>(18600) | 366<br>(24500) |
|                 | 468           | 474<br>(3300)  | 470            | 476<br>(8000)  | 476<br>(2000)  | –               | 470        | 476<br>(1600)  | 478<br>(2300)  |
| 7               | 346           | 358<br>(24500) | 346            | 356<br>(28500) | 358<br>(22000) | 350             | 352        | 356<br>(26600) | 344<br>(36000) |
|                 | 457           | 464<br>(2400)  | 458            | 466<br>(2100)  | 468<br>(1900)  | 463             | 466        | 472<br>(2700)  | 462<br>(2400)  |
| 8               | 358           | 364<br>(23000) | 362            | 364<br>(12800) | 364<br>(27400) | 362             | 358        | 364<br>(32900) | 366<br>(27000) |
|                 | 456           | 462<br>(2900)  | 456            | 460<br>(2400)  | 462<br>(5400)  | 458             | 452        | 458<br>(6700)  | 460<br>(0.057) |

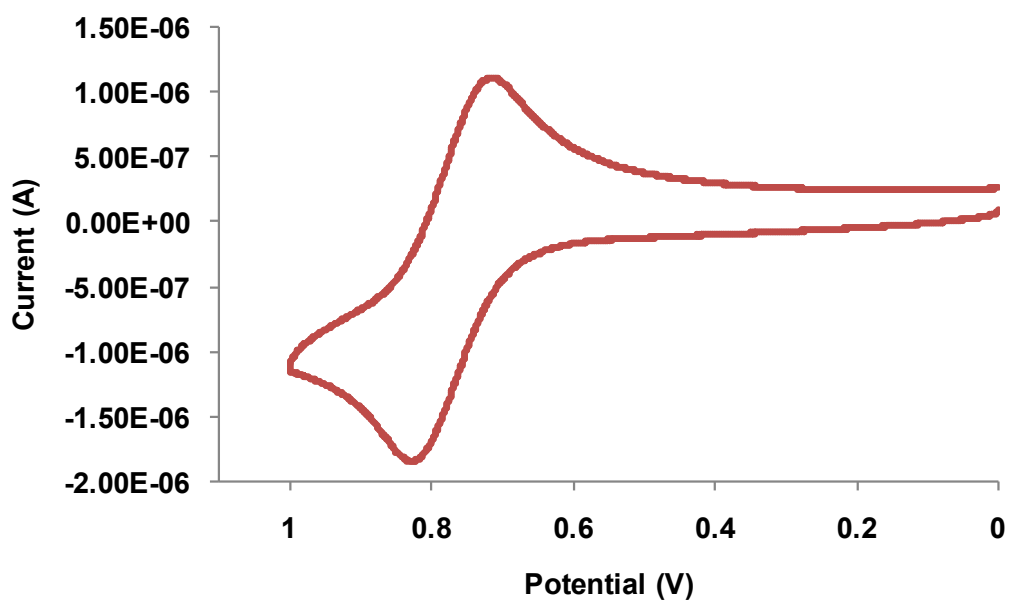

**Figure S18:** Cyclic voltammogram of **4** ( $1 \times 10^{-4}$ M in dichloromethane).

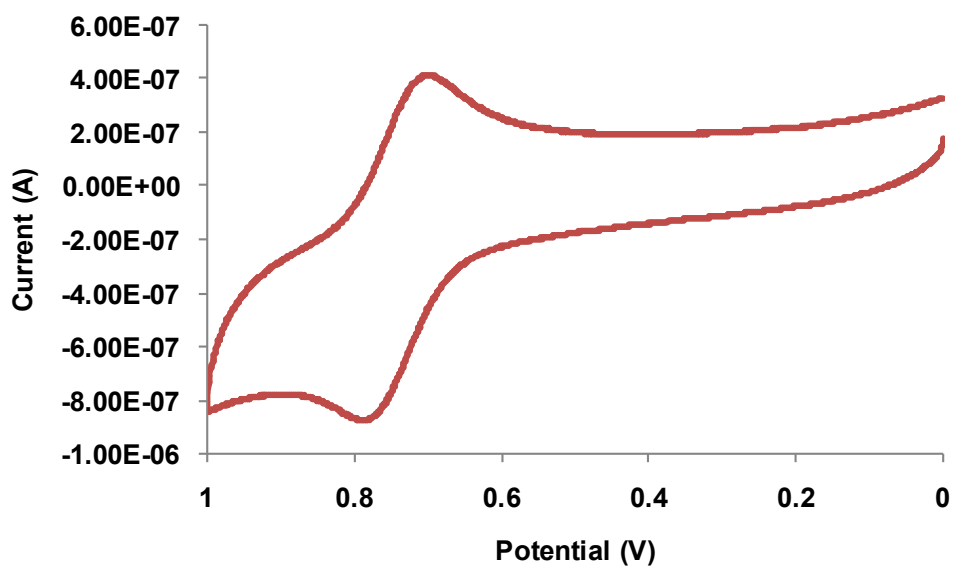

**Figure S19:** Cyclic voltammogram of **5** ( $1 \times 10^{-4}$ M in dichloromethane).

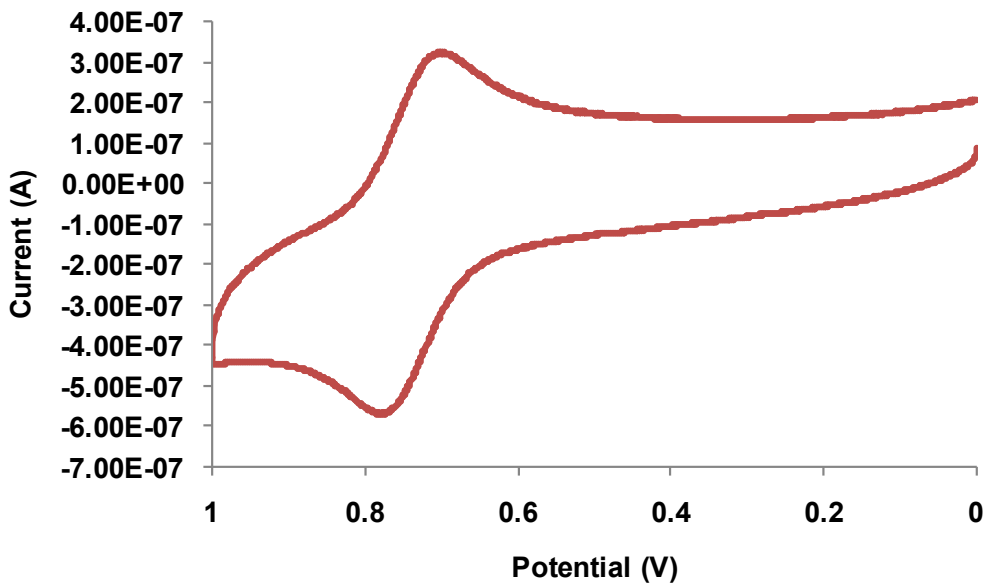

Figure S20: Cyclic voltammogram of 6 ( $1 \times 10^{-4}$ M in dichloromethane).

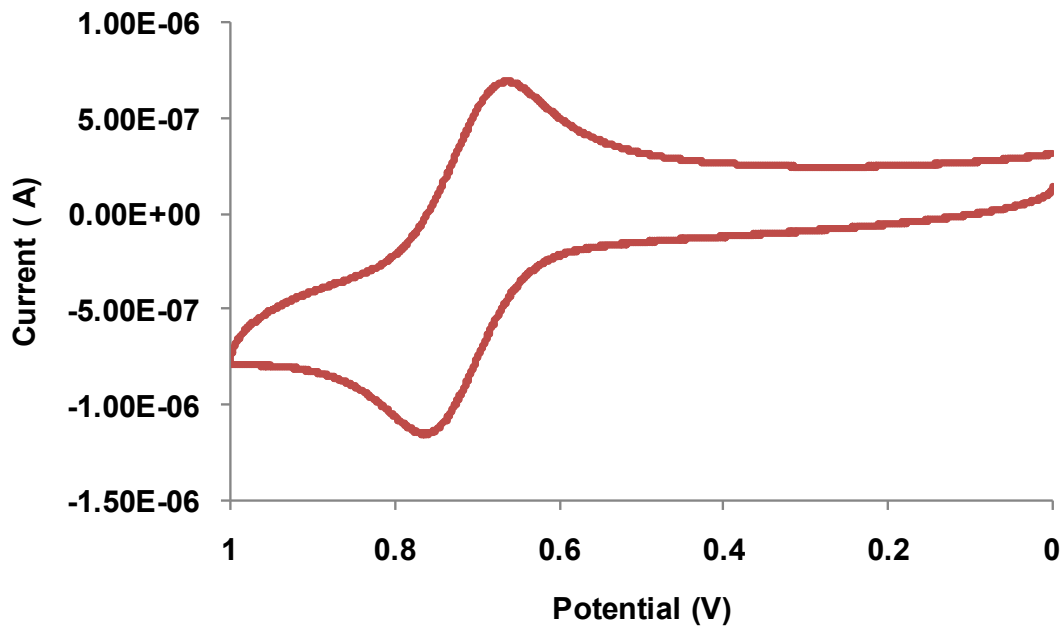

Figure S21: Cyclic voltammogram of 7 ( $1 \times 10^{-4}$ M in dichloromethane).

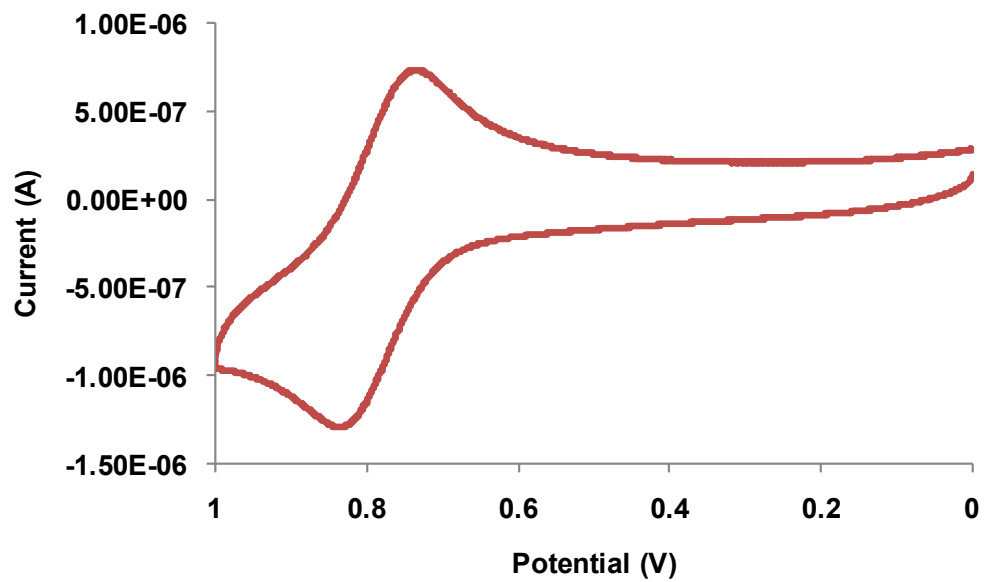

**Figure S22:** Cyclic voltammogram of **8** ( $1 \times 10^{-4}$ M in dichloromethane).



**Table S4:** Energies of the Frontier Orbitals HOMO-n to LUMO+n (n=0, 1, 2,3,4,5 & 6) obtained from TD-DFT carried out at B3LYP/6-31G level in dichloromethane as solvent medium.

| COMPOUND | 4        | 5        | 6        | 7        | 8        |
|----------|----------|----------|----------|----------|----------|
| HOMO-6   | -7.27034 | -7.33320 | -7.14979 | -6.99768 | -6.48610 |
| HOMO-5   | -7.02434 | -7.03795 | -7.02353 | -6.93047 | -6.19875 |
| HOMO-4   | -6.64964 | -6.81972 | -6.53835 | -6.43086 | -5.78677 |
| HOMO-3   | -6.51903 | -6.53862 | -6.48610 | -6.37399 | -5.55738 |
| HOMO-2   | -5.90432 | -5.97535 | -5.86813 | -5.75357 | -5.52690 |
| HOMO-1   | -5.56609 | -5.58296 | -5.56473 | -5.45751 | -5.49398 |
| HOMO     | -5.46758 | -5.49370 | -5.46268 | -5.35765 | -5.37180 |
| LUMO     | -2.43786 | -2.62100 | -2.50753 | -2.50181 | -2.44031 |
| LUMO+1   | -0.80845 | -1.30968 | -2.00003 | -1.23267 | -1.12192 |
| LUMO+2   | -0.56354 | -0.75783 | -0.77280 | -0.57279 | -0.67783 |
| LUMO+3   | -0.39374 | -0.60817 | -0.48735 | -0.41878 | -0.34613 |
| LUMO+4   | -0.35456 | -0.37932 | -0.39837 | -0.36408 | -0.33252 |
| LUMO+5   | -0.30803 | -0.37143 | -0.35402 | -0.28027 | -0.31918 |
| LUMO+6   | -0.22503 | -0.06285 | -0.34313 | -0.24082 | -0.31728 |

**Table S5:** Energies of the Frontier Orbitals HOMO-n to LUMO+n (n=0, 1, 2,3,4,5 & 6) obtained from TD-DFT carried out at B3LYP/6-31G level in gas phase.

| COMPOUND      | 4        | 5        | 6        | 7        | 8        |
|---------------|----------|----------|----------|----------|----------|
| <b>HOMO-6</b> | -7.27251 | -7.41401 | -7.06788 | -6.97455 | -6.44529 |
| <b>HOMO-5</b> | -7.05999 | -7.13319 | -6.99142 | -6.95632 | -6.10678 |
| <b>HOMO-4</b> | -6.62869 | -6.87550 | -6.57835 | -6.44746 | -5.71629 |
| <b>HOMO-3</b> | -6.55223 | -6.63631 | -6.51413 | -6.37127 | -5.54404 |
| <b>HOMO-2</b> | -5.88963 | -6.03358 | -5.87738 | -5.72908 | -5.48418 |
| <b>HOMO-1</b> | -5.60119 | -5.67956 | -5.60881 | -5.48908 | -5.45860 |
| <b>HOMO</b>   | -5.48146 | -5.57724 | -5.48717 | -5.37289 | -5.29642 |
| <b>LUMO</b>   | -2.40031 | -2.67324 | -2.49338 | -2.46399 | -2.31160 |
| <b>LUMO+1</b> | -0.80491 | -1.31485 | -1.94996 | -1.21145 | -1.01389 |
| <b>LUMO+2</b> | -0.59239 | -0.84926 | -0.77987 | -0.60763 | -0.58722 |
| <b>LUMO+3</b> | -0.38857 | -0.69688 | -0.57361 | -0.40381 | -0.33252 |
| <b>LUMO+4</b> | -0.37987 | -0.47701 | -0.45279 | -0.36653 | -0.27401 |
| <b>LUMO+5</b> | -0.29714 | -0.46613 | -0.39674 | -0.43715 | -0.25034 |
| <b>LUMO+6</b> | -0.18775 | -0.13088 | -0.37334 | -0.22503 | -0.24245 |

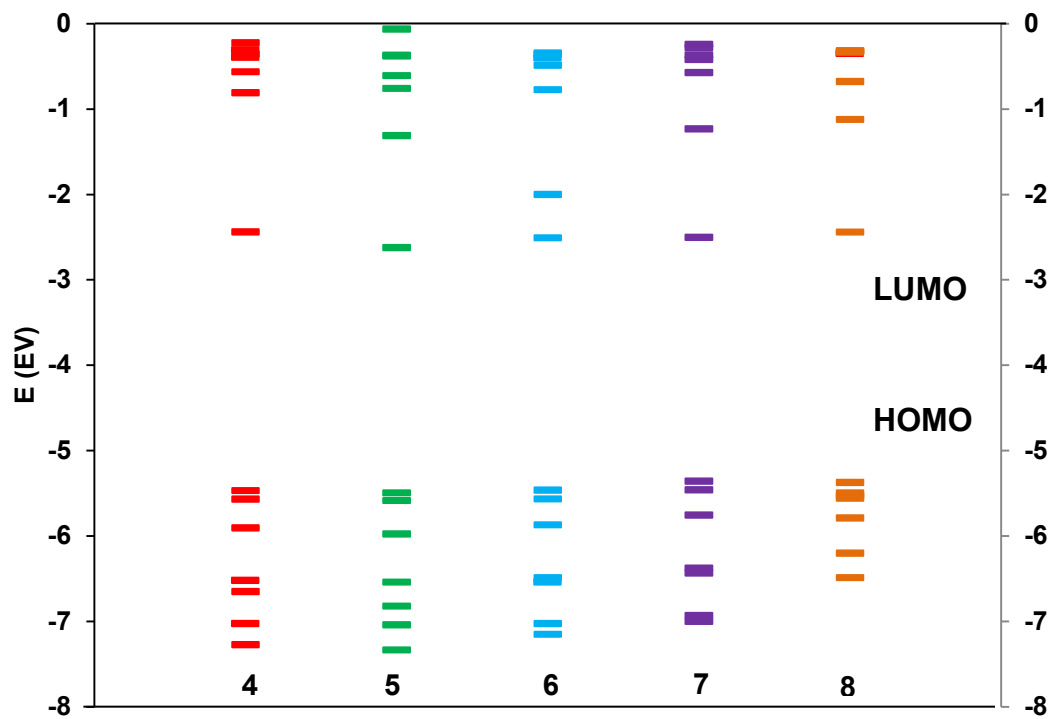

**Figure S23:** B3LYP/6-31G predicted energies of FMOS of the chromophores 4-8.

### Frontier Molecular Orbitals

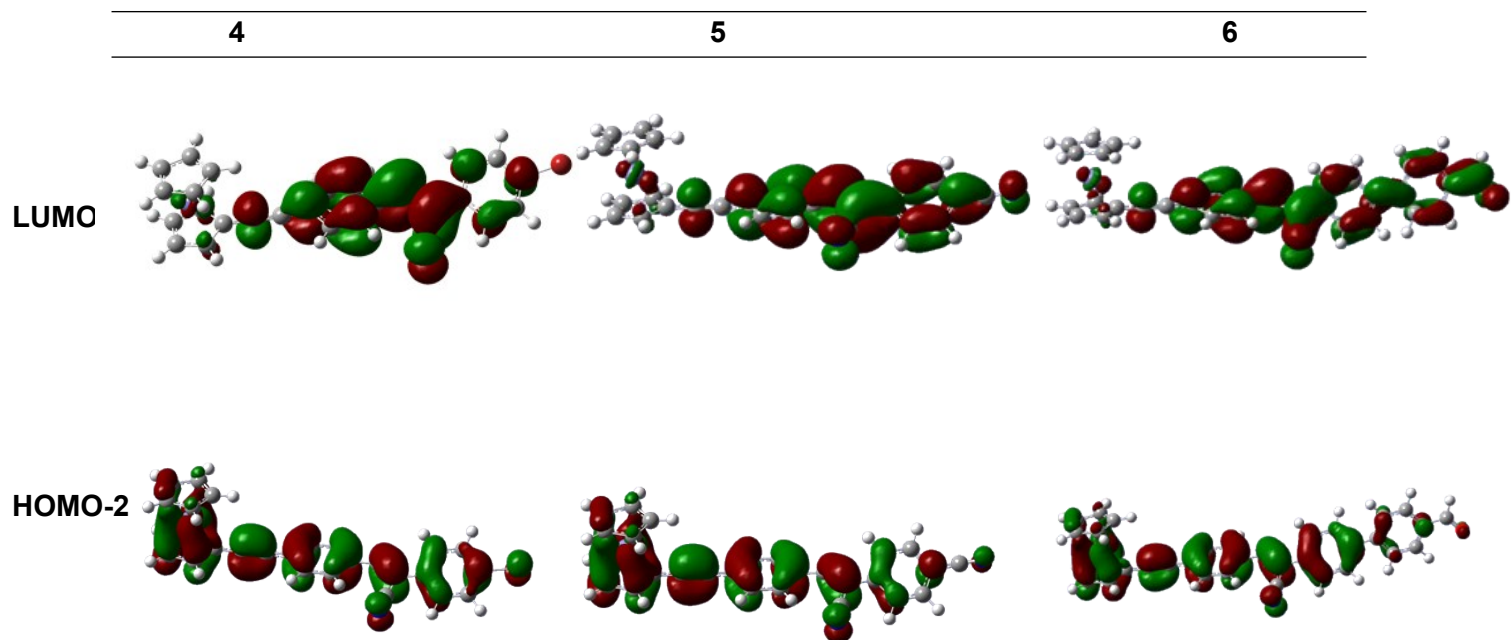

**Figure S24:** Contour Surfaces of frontier molecular orbitals involved in electronic transitions of HE bands of the chromophores **4-6**, obtained from TD-DFT calculations using dichloromethane as solvent at an isosurface value of 0.02 au.

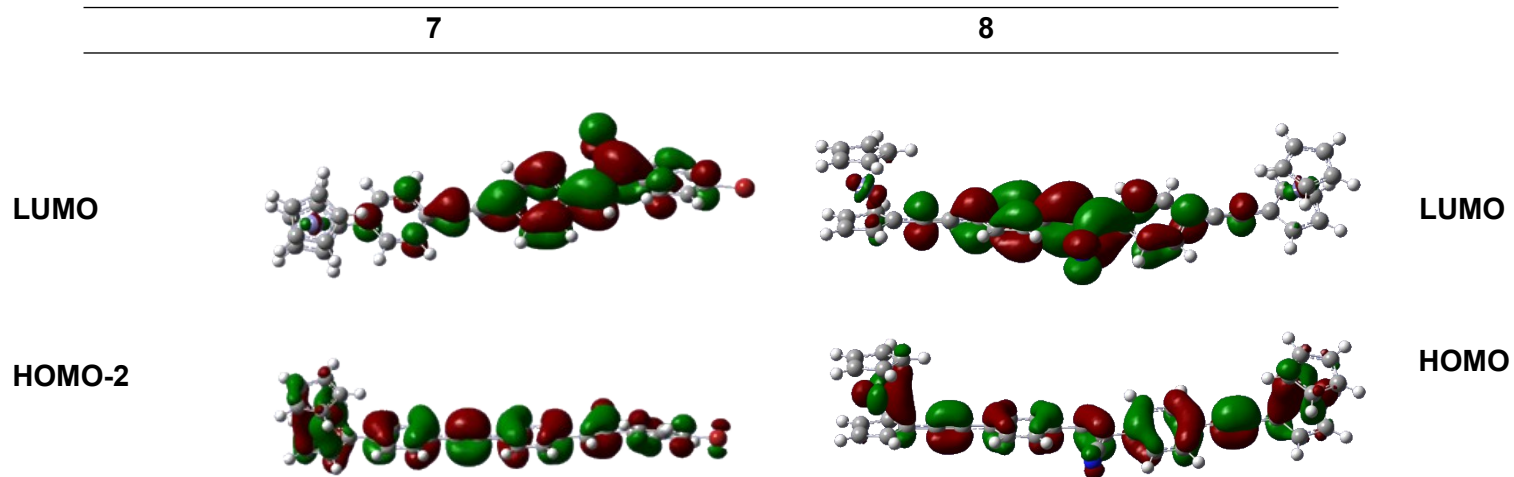

**Figure S25:** Contour Surfaces of frontier molecular orbitals involved in electronic transitions of HE bands of the chromophores **7-8**, obtained from TD-DFT calculations using dichloromethane as solvent at an isosurface value of 0.02 au.

**Table S6.** Cartesian coordinates from the optimized structure of **4** at B3LYP/6-31G

| Center | Atomic | Atomic | Coordinates (Angstroms) |           |           |
|--------|--------|--------|-------------------------|-----------|-----------|
| Number | Number | Type   | X                       | Y         | Z         |
| 1      | 6      | 0      | -7.659296               | 0.987207  | 0.209511  |
| 2      | 6      | 0      | -6.313205               | 1.353602  | 0.266204  |
| 3      | 6      | 0      | -5.290680               | 0.387652  | 0.172121  |
| 4      | 6      | 0      | -5.663942               | -0.966249 | 0.047130  |
| 5      | 6      | 0      | -7.007316               | -1.340642 | -0.011420 |
| 6      | 6      | 0      | -7.991233               | -0.357319 | 0.066051  |
| 7      | 1      | 0      | -8.436336               | 1.738826  | 0.275951  |
| 8      | 1      | 0      | -6.054883               | 2.400954  | 0.378787  |
| 9      | 1      | 0      | -4.905155               | -1.740499 | 0.028796  |
| 10     | 1      | 0      | -7.283972               | -2.384184 | -0.100229 |
| 11     | 35     | 0      | -9.863045               | -0.876231 | -0.007679 |
| 12     | 6      | 0      | -3.858475               | 0.797029  | 0.210843  |
| 13     | 6      | 0      | -2.874215               | 0.054956  | -0.383250 |
| 14     | 6      | 0      | -1.428471               | 0.224813  | -0.448035 |
| 15     | 6      | 0      | -0.711823               | -0.673192 | -1.277702 |
| 16     | 6      | 0      | -0.681712               | 1.200149  | 0.256522  |
| 17     | 6      | 0      | 0.668377                | -0.604023 | -1.410869 |
| 18     | 1      | 0      | -1.260347               | -1.434085 | -1.825847 |
| 19     | 6      | 0      | 0.699901                | 1.271972  | 0.128452  |
| 20     | 1      | 0      | -1.176925               | 1.903742  | 0.911692  |
| 21     | 6      | 0      | 1.407914                | 0.374717  | -0.706905 |
| 22     | 1      | 0      | 1.191430                | -1.301766 | -2.055195 |
| 23     | 1      | 0      | 1.252727                | 2.025520  | 0.678216  |
| 24     | 6      | 0      | 2.822002                | 0.451308  | -0.825374 |
| 25     | 6      | 0      | 4.036332                | 0.528610  | -0.932098 |

|    |    |   |           |           |           |
|----|----|---|-----------|-----------|-----------|
| 26 | 26 | 0 | 6.914368  | -0.258317 | 0.148533  |
| 27 | 6  | 0 | 6.300001  | -0.246136 | -1.831533 |
| 28 | 6  | 0 | 5.444006  | 0.606692  | -1.030620 |
| 29 | 6  | 0 | 6.288714  | 1.627538  | -0.442224 |
| 30 | 1  | 0 | 5.944132  | 2.426091  | 0.195660  |
| 31 | 6  | 0 | 7.630183  | 1.402465  | -0.880484 |
| 32 | 1  | 0 | 8.489441  | 1.999565  | -0.617814 |
| 33 | 6  | 0 | 7.637313  | 0.249189  | -1.735468 |
| 34 | 1  | 0 | 8.502835  | -0.169230 | -2.224931 |
| 35 | 6  | 0 | 6.787738  | -2.214000 | 0.849315  |
| 36 | 1  | 0 | 6.445040  | -3.072264 | 0.293137  |
| 37 | 6  | 0 | 5.971831  | -1.347715 | 1.650807  |
| 38 | 1  | 0 | 4.905003  | -1.430398 | 1.788450  |
| 39 | 6  | 0 | 6.820515  | -0.344477 | 2.226637  |
| 40 | 1  | 0 | 6.506383  | 0.449258  | 2.885970  |
| 41 | 6  | 0 | 8.163020  | -0.590685 | 1.780974  |
| 42 | 1  | 0 | 9.035600  | -0.015659 | 2.048581  |
| 43 | 6  | 0 | 8.142706  | -1.745967 | 0.929746  |
| 44 | 1  | 0 | 8.997627  | -2.192389 | 0.446531  |
| 45 | 1  | 0 | 5.966105  | -1.092038 | -2.411448 |
| 46 | 1  | 0 | -3.225727 | -0.816640 | -0.929962 |
| 47 | 6  | 0 | -3.590368 | 2.030974  | 0.883336  |
| 48 | 7  | 0 | -3.422699 | 3.054101  | 1.438654  |

---

**Table S7.** Cartesian coordinates from the optimized structure of **5** at B3LYP/6-31G

| Center<br>Number | Atomic<br>Number | Atomic<br>Type | Coordinates (Angstroms) |           |           |
|------------------|------------------|----------------|-------------------------|-----------|-----------|
|                  |                  |                | X                       | Y         | Z         |
| 1                | 6                | 0              | -8.623969               | 0.670474  | 0.228892  |
| 2                | 6                | 0              | -7.293561               | 1.076334  | 0.287506  |
| 3                | 6                | 0              | -6.241153               | 0.143572  | 0.174899  |
| 4                | 6                | 0              | -6.573115               | -1.220274 | 0.030135  |
| 5                | 6                | 0              | -7.900223               | -1.633869 | -0.032504 |
| 6                | 6                | 0              | -8.943680               | -0.691125 | 0.062043  |
| 7                | 1                | 0              | -9.419869               | 1.401967  | 0.309743  |
| 8                | 1                | 0              | -7.065601               | 2.128490  | 0.416511  |
| 9                | 1                | 0              | -5.790457               | -1.969373 | -0.001441 |
| 10               | 1                | 0              | -8.138032               | -2.686308 | -0.138014 |
| 11               | 6                | 0              | -4.823777               | 0.597138  | 0.215577  |
| 12               | 6                | 0              | -3.817339               | -0.115796 | -0.379498 |
| 13               | 6                | 0              | -2.379153               | 0.097372  | -0.448745 |
| 14               | 6                | 0              | -1.637152               | -0.790927 | -1.267281 |
| 15               | 6                | 0              | -1.661127               | 1.104753  | 0.241303  |
| 16               | 6                | 0              | -0.259904               | -0.684230 | -1.401517 |
| 17               | 1                | 0              | -2.163586               | -1.574672 | -1.804750 |
| 18               | 6                | 0              | -0.282421               | 1.213984  | 0.112086  |
| 19               | 1                | 0              | -2.176527               | 1.803760  | 0.885680  |
| 20               | 6                | 0              | 0.451214                | 0.324811  | -0.710405 |
| 21               | 1                | 0              | 0.283309                | -1.375489 | -2.035929 |
| 22               | 1                | 0              | 0.248744                | 1.990724  | 0.650666  |
| 23               | 6                | 0              | 1.862228                | 0.437332  | -0.828232 |
| 24               | 6                | 0              | 3.074790                | 0.541520  | -0.933912 |

|    |    |   |            |           |           |
|----|----|---|------------|-----------|-----------|
| 25 | 26 | 0 | 5.961862   | -0.194275 | 0.149632  |
| 26 | 6  | 0 | 5.353361   | -0.187981 | -1.832006 |
| 27 | 6  | 0 | 4.480391   | 0.647536  | -1.030610 |
| 28 | 6  | 0 | 5.305457   | 1.681994  | -0.437553 |
| 29 | 1  | 0 | 4.945491   | 2.472835  | 0.201424  |
| 30 | 6  | 0 | 6.651451   | 1.481760  | -0.873463 |
| 31 | 1  | 0 | 7.499493   | 2.093003  | -0.607038 |
| 32 | 6  | 0 | 6.681072   | 0.331082  | -1.731508 |
| 33 | 1  | 0 | 7.555063   | -0.070467 | -2.219979 |
| 34 | 6  | 0 | 5.865983   | -2.153482 | 0.845826  |
| 35 | 1  | 0 | 5.537815   | -3.015967 | 0.287440  |
| 36 | 6  | 0 | 5.035478   | -1.302329 | 1.648460  |
| 37 | 1  | 0 | 3.970010   | -1.402596 | 1.784946  |
| 38 | 6  | 0 | 5.867218   | -0.286918 | 2.227595  |
| 39 | 1  | 0 | 5.539784   | 0.499951  | 2.888686  |
| 40 | 6  | 0 | 7.213942   | -0.510517 | 1.782881  |
| 41 | 1  | 0 | 8.076978   | 0.077482  | 2.053227  |
| 42 | 6  | 0 | 7.213111   | -1.663850 | 0.928851  |
| 43 | 1  | 0 | 8.075670   | -2.095439 | 0.445777  |
| 44 | 1  | 0 | 5.035977   | -1.038144 | -2.414929 |
| 45 | 6  | 0 | -10.308190 | -1.114910 | 0.001264  |
| 46 | 7  | 0 | -11.428326 | -1.464743 | -0.050930 |
| 47 | 1  | 0 | -4.142445  | -0.999350 | -0.923137 |
| 48 | 6  | 0 | -4.593429  | 1.839174  | 0.886388  |
| 49 | 7  | 0 | -4.455281  | 2.866883  | 1.441195  |

---



**Table S8.** Cartesian coordinates from the optimized structure of **6** at B3LYP/6-31G

| Center<br>Number | Atomic<br>Number | Atomic<br>Type | Coordinates (Angstroms) |           |           |
|------------------|------------------|----------------|-------------------------|-----------|-----------|
|                  |                  |                | X                       | Y         | Z         |
| 1                | 6                | 0              | -6.519182               | 1.347512  | 0.303569  |
| 2                | 6                | 0              | -5.171290               | 1.689929  | 0.388066  |
| 3                | 6                | 0              | -4.164905               | 0.706658  | 0.304019  |
| 4                | 6                | 0              | -4.567768               | -0.636703 | 0.161733  |
| 5                | 6                | 0              | -5.916007               | -0.976757 | 0.078924  |
| 6                | 6                | 0              | -6.923130               | 0.007278  | 0.143452  |
| 7                | 1                | 0              | -7.268658               | 2.127064  | 0.389790  |
| 8                | 1                | 0              | -4.894053               | 2.730025  | 0.522705  |
| 9                | 1                | 0              | -3.824036               | -1.425786 | 0.139297  |
| 10               | 1                | 0              | -6.191400               | -2.018251 | -0.049993 |
| 11               | 6                | 0              | -2.726189               | 1.083985  | 0.368836  |
| 12               | 6                | 0              | -1.751605               | 0.334593  | -0.232649 |
| 13               | 6                | 0              | -0.302178               | 0.477163  | -0.276508 |
| 14               | 6                | 0              | 0.403347                | -0.378033 | -1.159028 |
| 15               | 6                | 0              | 0.457683                | 1.386489  | 0.498623  |
| 16               | 6                | 0              | 1.785420                | -0.325585 | -1.279520 |
| 17               | 1                | 0              | -0.155421               | -1.090027 | -1.759982 |
| 18               | 6                | 0              | 1.841620                | 1.438992  | 0.385716  |
| 19               | 1                | 0              | -0.029559               | 2.052668  | 1.197617  |
| 20               | 6                | 0              | 2.538277                | 0.588448  | -0.505927 |
| 21               | 1                | 0              | 2.300028                | -0.988145 | -1.966436 |
| 22               | 1                | 0              | 2.404575                | 2.141654  | 0.989880  |
| 23               | 6                | 0              | 3.954246                | 0.645902  | -0.614004 |
| 24               | 6                | 0              | 5.169939                | 0.708899  | -0.714067 |
| 25               | 26               | 0              | 8.031684                | -0.447508 | 0.034703  |

|    |   |   |            |           |           |
|----|---|---|------------|-----------|-----------|
| 26 | 6 | 0 | 7.389890   | 0.143988  | -1.844765 |
| 27 | 6 | 0 | 6.578575   | 0.763964  | -0.815482 |
| 28 | 6 | 0 | 7.469857   | 1.548934  | 0.015426  |
| 29 | 1 | 0 | 7.165618   | 2.143907  | 0.862035  |
| 30 | 6 | 0 | 8.795542   | 1.412559  | -0.500869 |
| 31 | 1 | 0 | 9.680778   | 1.881702  | -0.100862 |
| 32 | 6 | 0 | 8.746207   | 0.548385  | -1.646236 |
| 33 | 1 | 0 | 9.587932   | 0.258480  | -2.255608 |
| 34 | 6 | 0 | 7.903117   | -2.522952 | 0.133902  |
| 35 | 1 | 0 | 7.573846   | -3.181598 | -0.654284 |
| 36 | 6 | 0 | 7.069737   | -1.926997 | 1.138325  |
| 37 | 1 | 0 | 6.001258   | -2.046005 | 1.228301  |
| 38 | 6 | 0 | 7.903818   | -1.134458 | 1.995483  |
| 39 | 1 | 0 | 7.575080   | -0.567527 | 2.852162  |
| 40 | 6 | 0 | 9.254577   | -1.240546 | 1.520659  |
| 41 | 1 | 0 | 10.119898  | -0.769071 | 1.959513  |
| 42 | 6 | 0 | 9.254313   | -2.098545 | 0.370196  |
| 43 | 1 | 0 | 10.119041  | -2.383750 | -0.208205 |
| 44 | 1 | 0 | 7.015088   | -0.490653 | -2.632216 |
| 45 | 6 | 0 | -8.358426  | -0.356309 | 0.058244  |
| 46 | 6 | 0 | -8.837540  | -1.554953 | 0.627406  |
| 47 | 6 | 0 | -9.281372  | 0.491297  | -0.596490 |
| 48 | 6 | 0 | -10.186790 | -1.893442 | 0.544149  |
| 49 | 1 | 0 | -8.152340  | -2.205328 | 1.160179  |
| 50 | 6 | 0 | -10.628053 | 0.154568  | -0.679317 |
| 51 | 1 | 0 | -8.927095  | 1.403952  | -1.063559 |
| 52 | 6 | 0 | -11.095769 | -1.044042 | -0.108782 |
| 53 | 1 | 0 | -10.544408 | -2.815790 | 0.994552  |

|    |   |   |            |           |           |
|----|---|---|------------|-----------|-----------|
| 54 | 1 | 0 | -11.337454 | 0.798318  | -1.188278 |
| 55 | 6 | 0 | -12.517485 | -1.411573 | -0.191305 |
| 56 | 1 | 0 | -12.784984 | -2.370903 | 0.289356  |
| 57 | 8 | 0 | -13.392892 | -0.728313 | -0.749644 |
| 58 | 1 | 0 | -2.116103  | -0.513309 | -0.807501 |
| 59 | 6 | 0 | -2.438332  | 2.297611  | 1.070250  |
| 60 | 7 | 0 | -2.254164  | 3.304649  | 1.649172  |

**Table S9.** Cartesian coordinates from the optimized structure of **7** at B3LYP/6-31G

| Center<br>Number | Atomic<br>Number | Atomic<br>Type | Coordinates (Angstroms) |           |           |
|------------------|------------------|----------------|-------------------------|-----------|-----------|
|                  |                  |                | X                       | Y         | Z         |
| 1                | 6                | 0              | 10.063896               | 0.870827  | 0.049317  |
| 2                | 6                | 0              | 8.727618                | 1.267426  | 0.129655  |
| 3                | 6                | 0              | 7.688972                | 0.317275  | 0.206859  |
| 4                | 6                | 0              | 8.037363                | -1.048835 | 0.230390  |
| 5                | 6                | 0              | 9.370662                | -1.453512 | 0.149533  |
| 6                | 6                | 0              | 10.370050               | -0.487390 | 0.054673  |
| 7                | 1                | 0              | 10.853155               | 1.609684  | -0.016645 |
| 8                | 1                | 0              | 8.489436                | 2.325542  | 0.125968  |
| 9                | 1                | 0              | 7.268614                | -1.804721 | 0.345576  |
| 10               | 1                | 0              | 9.628624                | -2.505280 | 0.175718  |
| 11               | 6                | 0              | 6.266361                | 0.756481  | 0.266250  |
| 12               | 6                | 0              | 5.242148                | -0.036193 | -0.175218 |
| 13               | 35               | 0              | 12.228167               | -1.048045 | -0.052499 |
| 14               | 6                | 0              | 3.797293                | 0.152290  | -0.189579 |
| 15               | 6                | 0              | 3.027193                | -0.839590 | -0.846716 |
| 16               | 6                | 0              | 3.101002                | 1.232507  | 0.405375  |

|    |    |   |            |           |           |
|----|----|---|------------|-----------|-----------|
| 17 | 6  | 0 | 1.643200   | -0.761942 | -0.920221 |
| 18 | 1  | 0 | 3.536808   | -1.681488 | -1.306848 |
| 19 | 6  | 0 | 1.715639   | 1.313496  | 0.336678  |
| 20 | 1  | 0 | 3.638866   | 2.011832  | 0.927618  |
| 21 | 6  | 0 | 0.954213   | 0.321830  | -0.327365 |
| 22 | 1  | 0 | 1.078110   | -1.533330 | -1.431260 |
| 23 | 1  | 0 | 1.201622   | 2.148135  | 0.800118  |
| 24 | 6  | 0 | -0.462436  | 0.410339  | -0.391365 |
| 25 | 6  | 0 | -1.680946  | 0.485513  | -0.444064 |
| 26 | 6  | 0 | -3.100080  | 0.570876  | -0.502648 |
| 27 | 6  | 0 | -3.791457  | 1.631007  | 0.125417  |
| 28 | 6  | 0 | -3.858487  | -0.403986 | -1.191529 |
| 29 | 6  | 0 | -5.180030  | 1.708699  | 0.066410  |
| 30 | 1  | 0 | -3.226167  | 2.392982  | 0.650997  |
| 31 | 6  | 0 | -5.245651  | -0.321006 | -1.240863 |
| 32 | 1  | 0 | -3.344568  | -1.225370 | -1.679139 |
| 33 | 6  | 0 | -5.940862  | 0.735235  | -0.613456 |
| 34 | 1  | 0 | -5.684125  | 2.546221  | 0.536025  |
| 35 | 1  | 0 | -5.803015  | -1.091656 | -1.762725 |
| 36 | 26 | 0 | -8.850125  | -0.394920 | 0.208170  |
| 37 | 6  | 0 | -9.611967  | 0.641875  | -1.421940 |
| 38 | 6  | 0 | -9.610268  | 1.482667  | -0.259869 |
| 39 | 6  | 0 | -8.259717  | 1.595322  | 0.203320  |
| 40 | 1  | 0 | -7.937204  | 2.159017  | 1.064611  |
| 41 | 6  | 0 | -7.406519  | 0.830330  | -0.676007 |
| 42 | 6  | 0 | -8.263107  | 0.234021  | -1.676284 |
| 43 | 1  | 0 | -7.936218  | -0.375436 | -2.503956 |
| 44 | 6  | 0 | -10.057191 | -2.058461 | 0.535390  |

|    |   |   |            |           |           |
|----|---|---|------------|-----------|-----------|
| 45 | 1 | 0 | -10.926872 | -2.341798 | -0.036485 |
| 46 | 6 | 0 | -10.049460 | -1.216461 | 1.697707  |
| 47 | 1 | 0 | -10.912632 | -0.756760 | 2.153051  |
| 48 | 6 | 0 | -8.693883  | -1.107020 | 2.157428  |
| 49 | 1 | 0 | -8.358784  | -0.549900 | 3.018121  |
| 50 | 6 | 0 | -7.864078  | -1.881195 | 1.279499  |
| 51 | 1 | 0 | -6.794378  | -1.997577 | 1.357736  |
| 52 | 6 | 0 | -8.705943  | -2.469520 | 0.276968  |
| 53 | 1 | 0 | -8.382726  | -3.117679 | -0.522492 |
| 54 | 1 | 0 | -10.475429 | 0.374613  | -2.010653 |
| 55 | 1 | 0 | -10.473912 | 1.950588  | 0.186043  |
| 56 | 1 | 0 | 5.552463   | -0.978557 | -0.619747 |
| 57 | 6 | 0 | 6.050618   | 2.071534  | 0.786706  |
| 58 | 7 | 0 | 5.925842   | 3.160542  | 1.212955  |

**Table S10.** Cartesian coordinates from the optimized structure of **8** at B3LYP/6-31G

| Center<br>Number | Atomic<br>Number | Atomic<br>Type | Coordinates (Angstroms) |           |           |
|------------------|------------------|----------------|-------------------------|-----------|-----------|
|                  |                  |                | X                       | Y         | Z         |
| 1                | 6                | 0              | 4.263745                | -1.815910 | 0.615062  |
| 2                | 6                | 0              | 2.904438                | -1.949589 | 0.880599  |
| 3                | 6                | 0              | 1.955610                | -1.090659 | 0.287169  |
| 4                | 6                | 0              | 2.431299                | -0.070021 | -0.563192 |
| 5                | 6                | 0              | 3.788479                | 0.067354  | -0.833856 |
| 6                | 6                | 0              | 4.736614                | -0.806895 | -0.253744 |
| 7                | 1                | 0              | 4.974370                | -2.493135 | 1.075672  |
| 8                | 1                | 0              | 2.570346                | -2.734484 | 1.550815  |
| 9                | 1                | 0              | 1.737487                | 0.643903  | -0.993469 |

|    |    |   |           |           |           |
|----|----|---|-----------|-----------|-----------|
| 10 | 1  | 0 | 4.133247  | 0.862950  | -1.485217 |
| 11 | 6  | 0 | 0.502915  | -1.263645 | 0.557831  |
| 12 | 6  | 0 | -0.458047 | -0.845727 | -0.323405 |
| 13 | 1  | 0 | -0.075539 | -0.431253 | -1.252657 |
| 14 | 6  | 0 | -1.913850 | -0.872963 | -0.268426 |
| 15 | 6  | 0 | -2.608174 | -0.454735 | -1.431211 |
| 16 | 6  | 0 | -2.690959 | -1.271241 | 0.846636  |
| 17 | 6  | 0 | -3.995045 | -0.440356 | -1.491225 |
| 18 | 1  | 0 | -2.036314 | -0.139916 | -2.299651 |
| 19 | 6  | 0 | -4.079374 | -1.256821 | 0.792117  |
| 20 | 1  | 0 | -2.213474 | -1.591276 | 1.762585  |
| 21 | 6  | 0 | -4.764807 | -0.843823 | -0.375483 |
| 22 | 1  | 0 | -4.500111 | -0.118661 | -2.395187 |
| 23 | 1  | 0 | -4.654768 | -1.565587 | 1.657808  |
| 24 | 6  | 0 | 0.179583  | -1.921143 | 1.787425  |
| 25 | 7  | 0 | -0.036791 | -2.470600 | 2.804524  |
| 26 | 6  | 0 | 6.125896  | -0.664450 | -0.527534 |
| 27 | 6  | 0 | -6.185340 | -0.830690 | -0.422410 |
| 28 | 6  | 0 | -7.405952 | -0.836604 | -0.466704 |
| 29 | 26 | 0 | 10.160939 | 0.674045  | -0.060617 |
| 30 | 6  | 0 | 9.756200  | -1.287072 | -0.599948 |
| 31 | 6  | 0 | 9.297580  | 0.562876  | -1.942749 |
| 32 | 1  | 0 | 8.764018  | 1.346378  | -2.457278 |
| 33 | 6  | 0 | 10.696379 | 0.280943  | -2.031182 |
| 34 | 1  | 0 | 11.415139 | 0.827036  | -2.621944 |
| 35 | 6  | 0 | 10.978739 | -0.858107 | -1.204185 |
| 36 | 1  | 0 | 11.946040 | -1.315818 | -1.067674 |
| 37 | 6  | 0 | 10.370514 | 0.741326  | 2.009465  |

|    |    |   |            |           |           |
|----|----|---|------------|-----------|-----------|
| 38 | 1  | 0 | 10.306551  | -0.096484 | 2.685815  |
| 39 | 6  | 0 | 9.279130   | 1.575244  | 1.595042  |
| 40 | 1  | 0 | 8.248058   | 1.464153  | 1.892401  |
| 41 | 6  | 0 | 9.796424   | 2.574770  | 0.705024  |
| 42 | 1  | 0 | 9.225710   | 3.357387  | 0.230376  |
| 43 | 6  | 0 | 11.209312  | 2.358479  | 0.568777  |
| 44 | 1  | 0 | 11.887411  | 2.951499  | -0.024672 |
| 45 | 6  | 0 | 11.564199  | 1.225203  | 1.374903  |
| 46 | 1  | 0 | 12.555547  | 0.816906  | 1.493786  |
| 47 | 1  | 0 | 9.625273   | -2.127425 | 0.063388  |
| 48 | 6  | 0 | 7.315549   | -0.552538 | -0.778751 |
| 49 | 6  | 0 | 8.695390   | -0.410336 | -1.053884 |
| 50 | 26 | 0 | -10.164166 | 0.675629  | -0.011650 |
| 51 | 6  | 0 | -9.712161  | -1.270994 | 0.541628  |
| 52 | 6  | 0 | -11.007566 | -0.718649 | -1.304512 |
| 53 | 1  | 0 | -11.859196 | -0.565447 | -1.948698 |
| 54 | 6  | 0 | -9.641520  | -0.480970 | -1.651536 |
| 55 | 1  | 0 | -9.269409  | -0.129018 | -2.600745 |
| 56 | 6  | 0 | -8.818705  | -0.824115 | -0.508604 |
| 57 | 6  | 0 | -9.912580  | 1.894107  | 1.657060  |
| 58 | 1  | 0 | -9.578603  | 1.580684  | 2.633594  |
| 59 | 6  | 0 | -11.274994 | 1.946125  | 1.206866  |
| 60 | 1  | 0 | -12.145084 | 1.680322  | 1.786503  |
| 61 | 6  | 0 | -11.277423 | 2.429531  | -0.144542 |
| 62 | 1  | 0 | -12.149516 | 2.592101  | -0.758222 |
| 63 | 6  | 0 | -9.916425  | 2.676667  | -0.529476 |
| 64 | 1  | 0 | -9.585743  | 3.054043  | -1.484320 |
| 65 | 6  | 0 | -9.074117  | 2.345799  | 0.583841  |

|    |   |   |            |           |          |
|----|---|---|------------|-----------|----------|
| 66 | 1 | 0 | -7.997728  | 2.414860  | 0.606872 |
| 67 | 1 | 0 | -9.401715  | -1.611874 | 1.516667 |
| 68 | 6 | 0 | -11.050930 | -1.205351 | 0.045488 |
| 69 | 1 | 0 | -11.940741 | -1.479278 | 0.590473 |

---



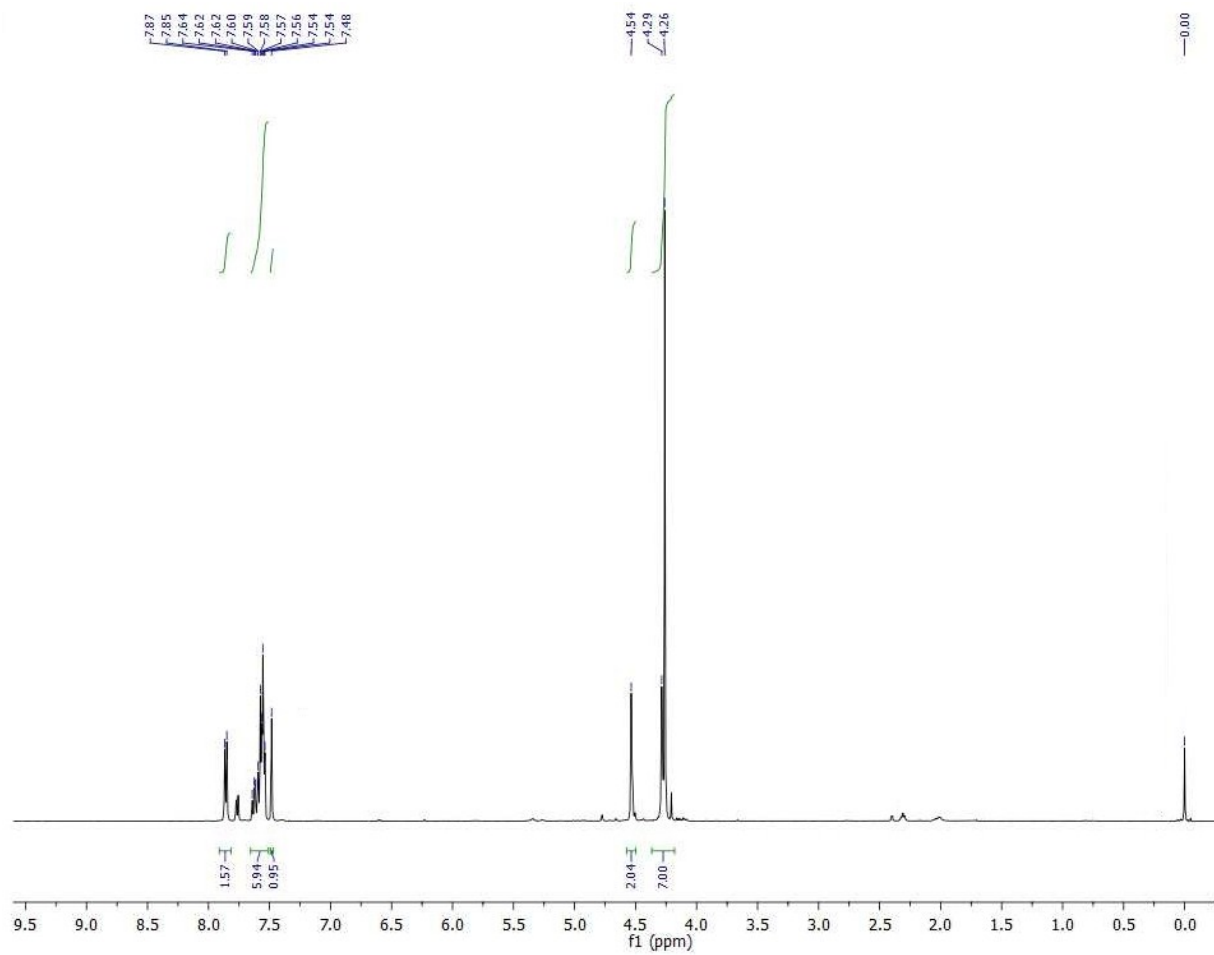

**Figure S26:**  $^1\text{H}$  NMR ( $\text{CDCl}_3$ ) of **4**

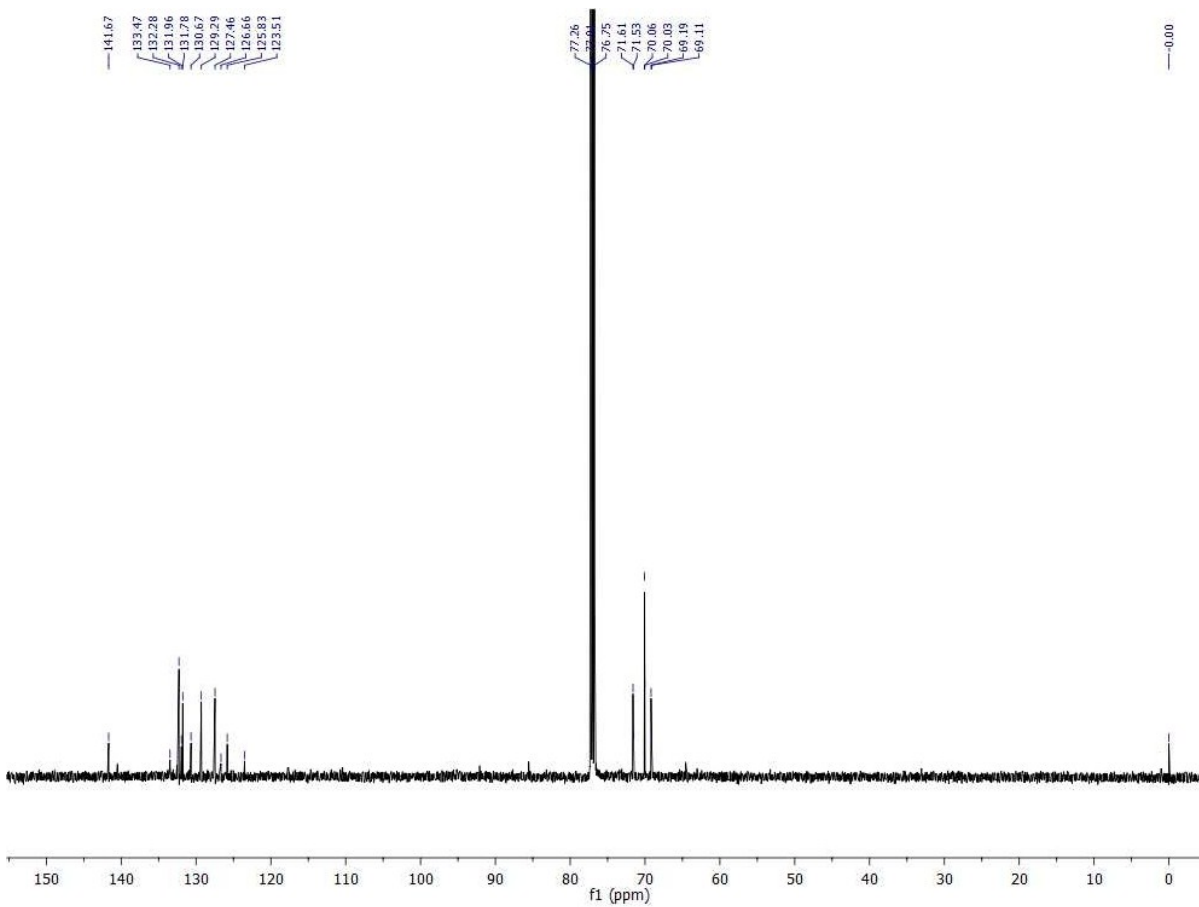

**Figure S27:**  $^{13}\text{C}$  NMR ( $\text{CDCl}_3$ ) of 4.

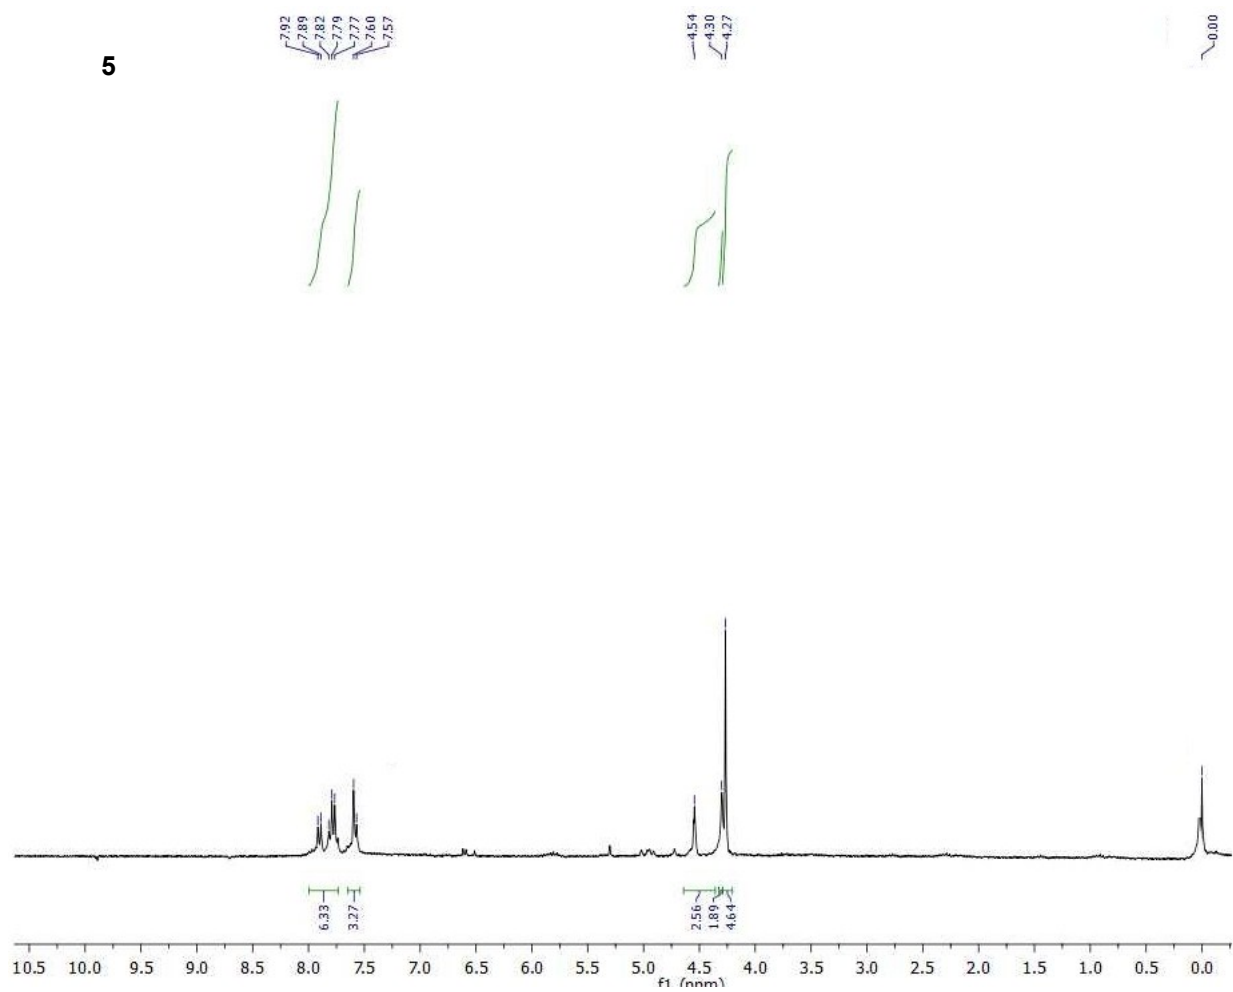

**Figure S28:**  $^1\text{H}$  NMR ( $\text{CDCl}_3$ ) of **5**.

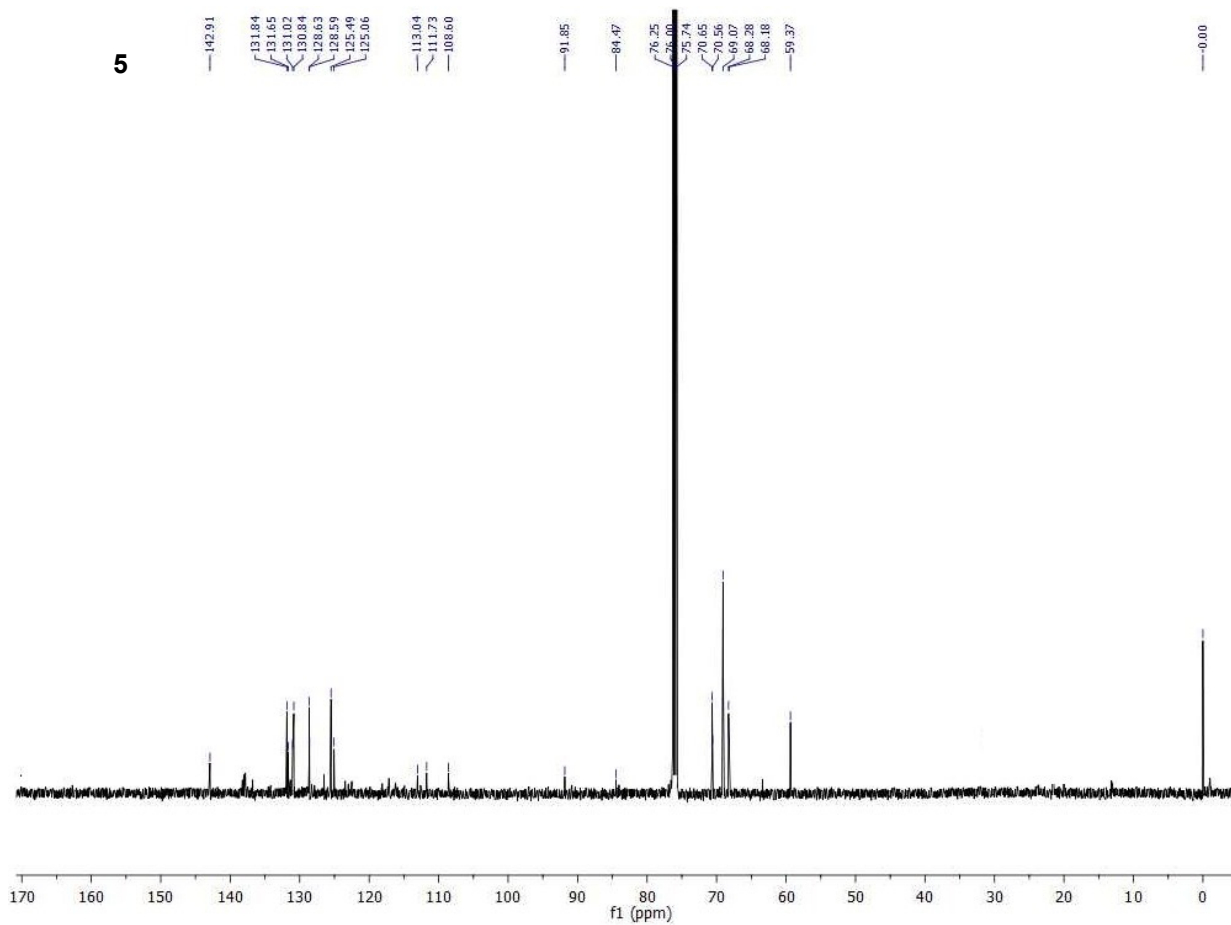

**Figure S29:**  $^{13}\text{C}$  NMR ( $\text{CDCl}_3$ ) of **5**.

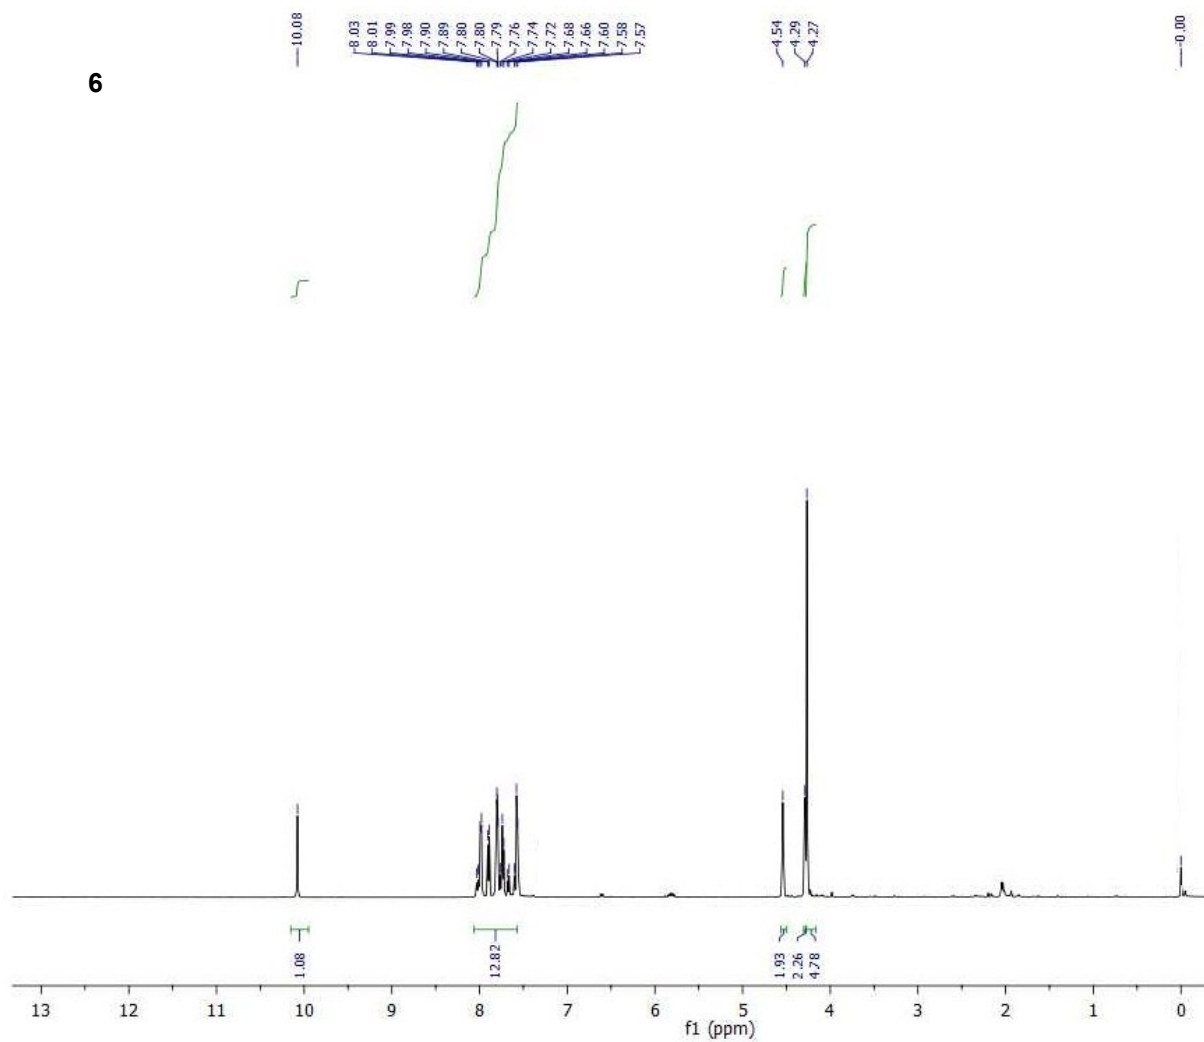

**Figure S30:**  $^1\text{H}$  NMR ( $\text{CDCl}_3$ ) of **6**.

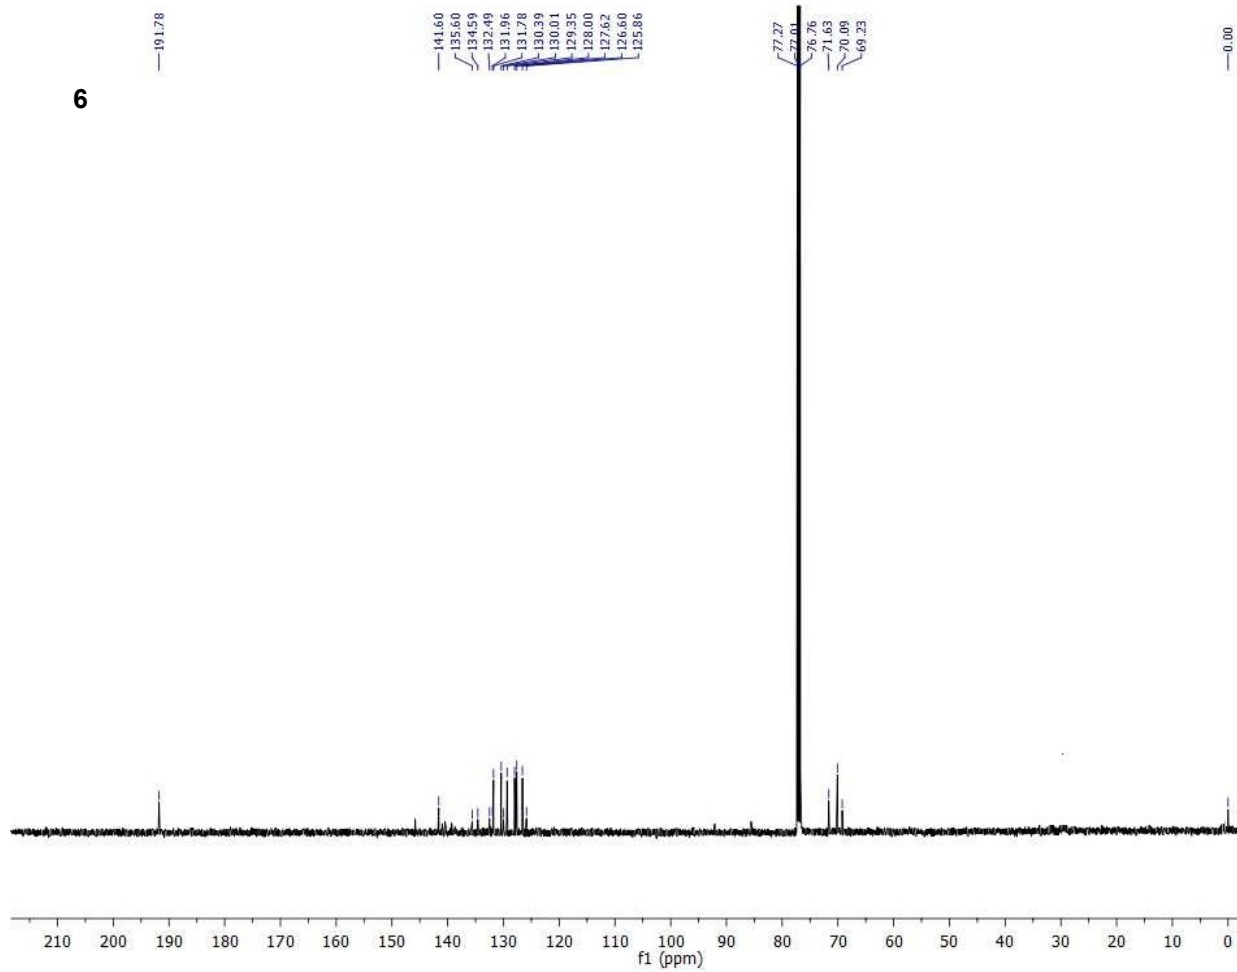

**Figure S31:**  $^{13}\text{C}$  NMR ( $\text{CDCl}_3$ ) of **6**.

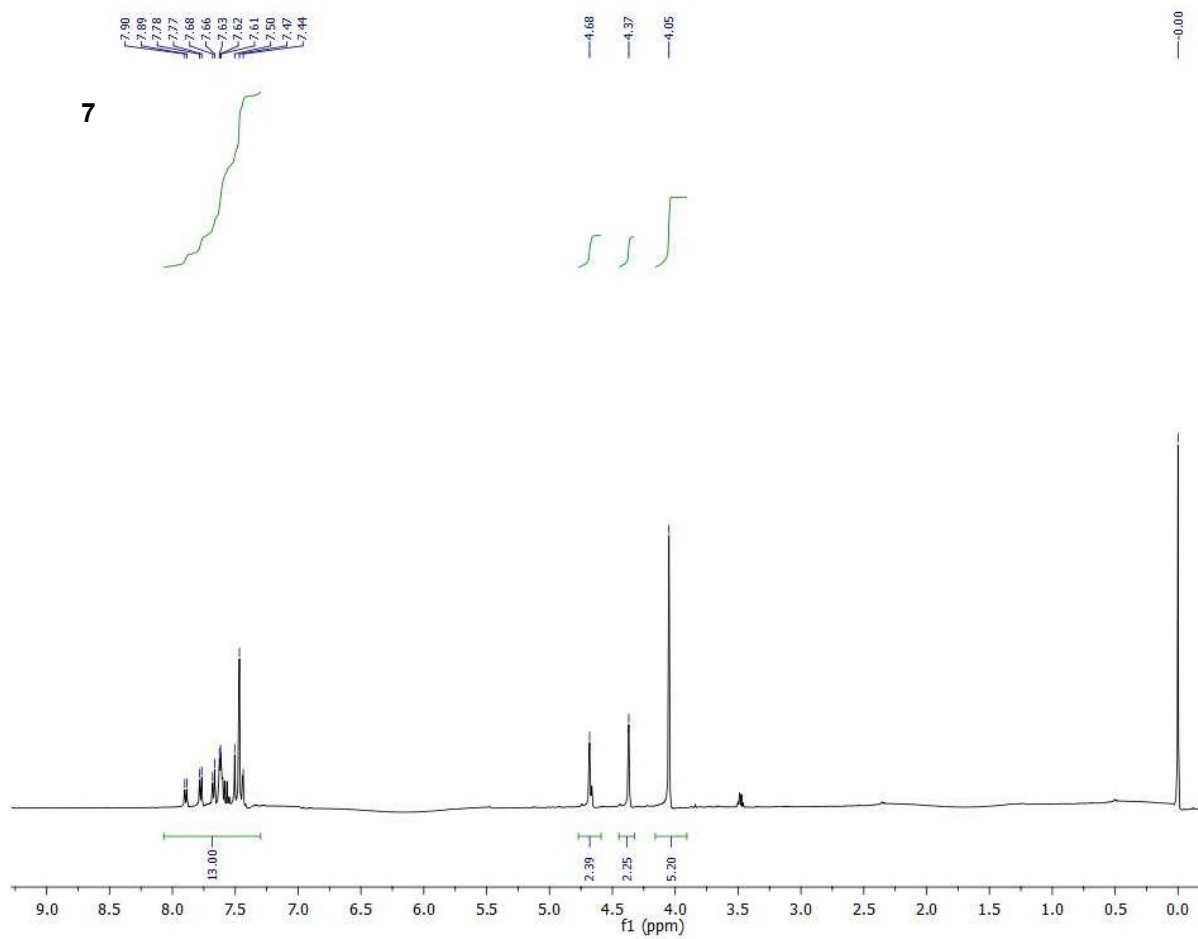

**Figure S32:**  $^1\text{H}$  NMR ( $\text{CDCl}_3$ ) of **7**.

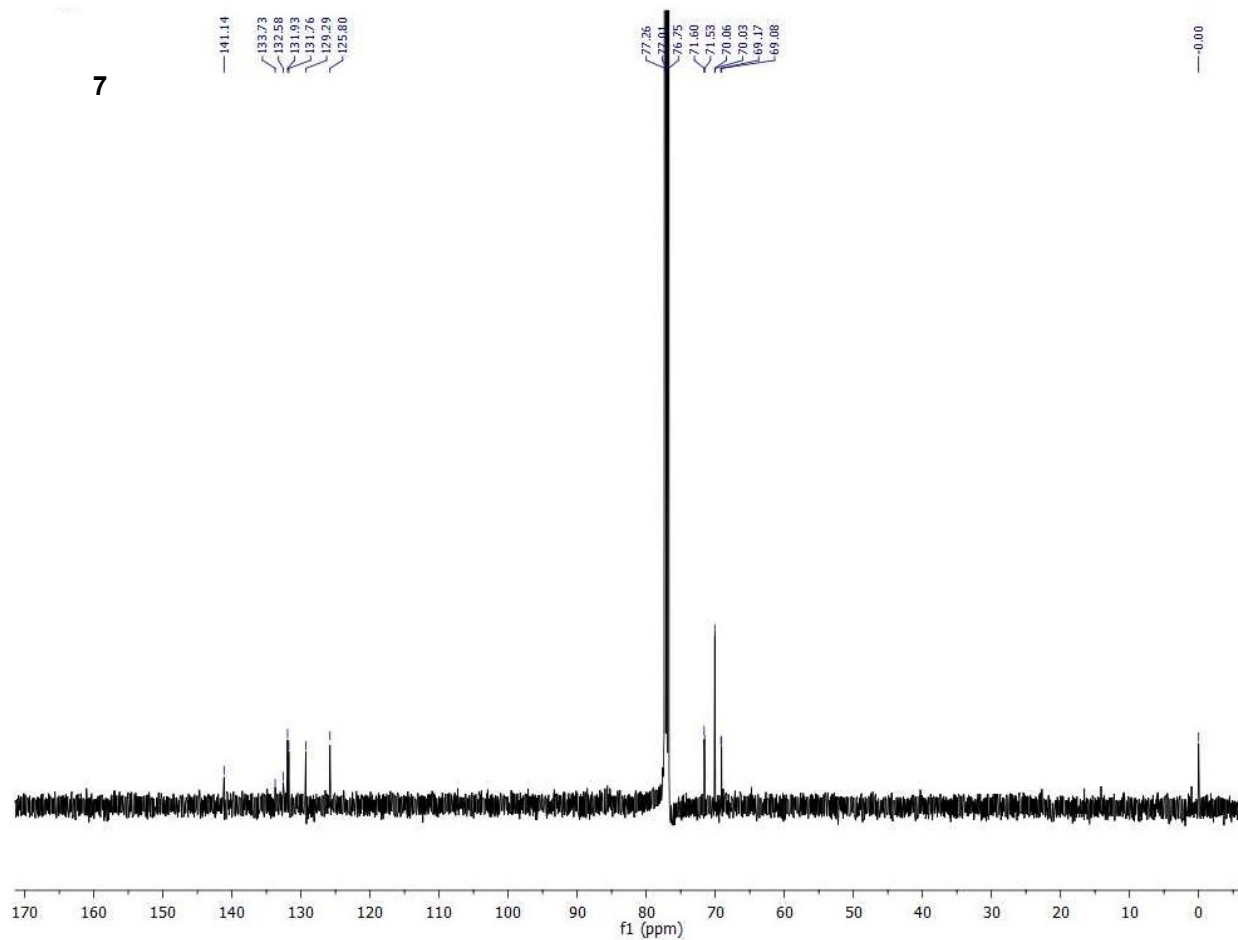

Figure S33:  $^{13}\text{C}$  NMR ( $\text{CDCl}_3$ ) of 7.



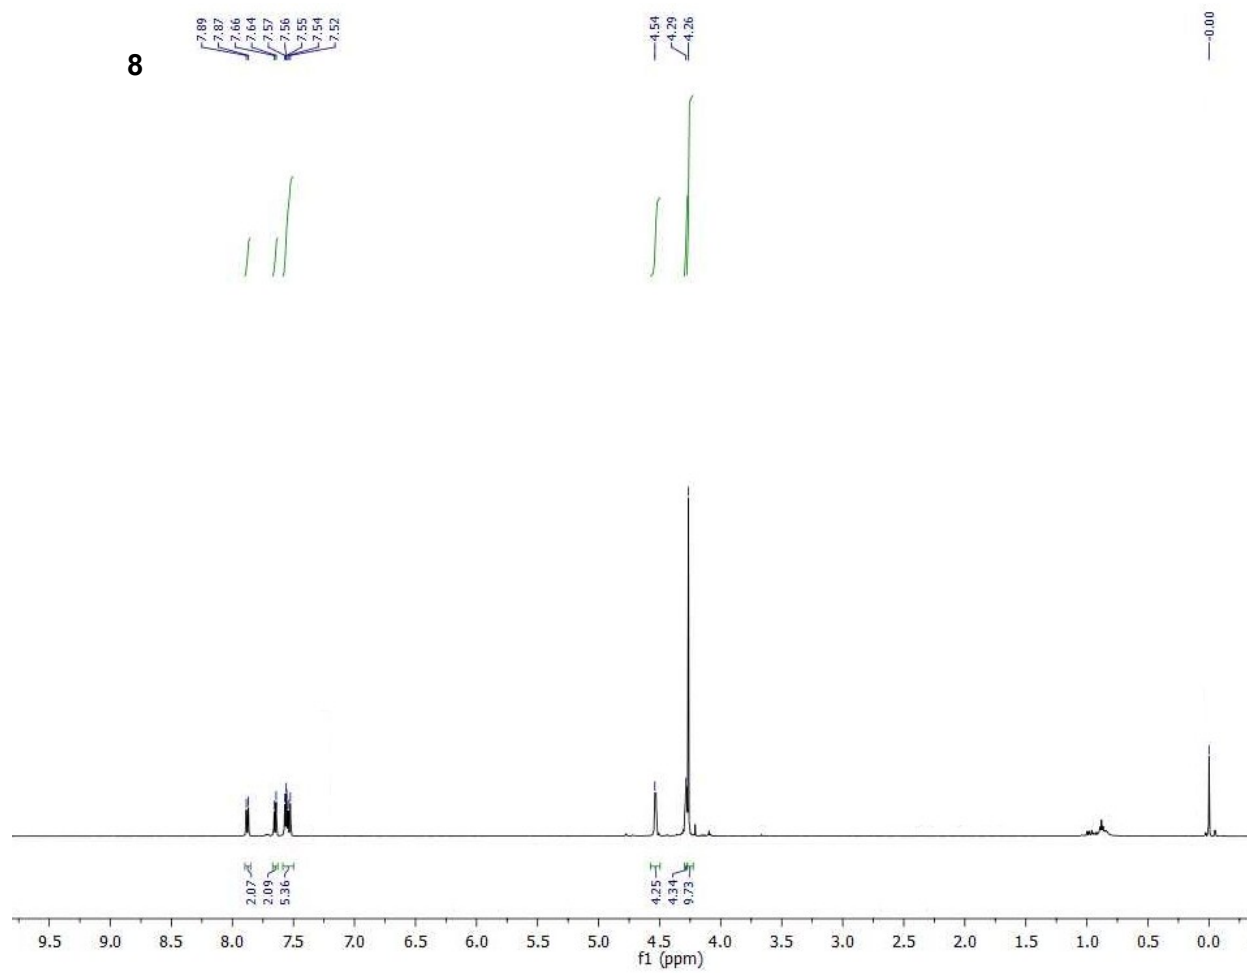

**Figure S34:**  $^1\text{H}$  NMR ( $\text{CDCl}_3$ ) of **8**.

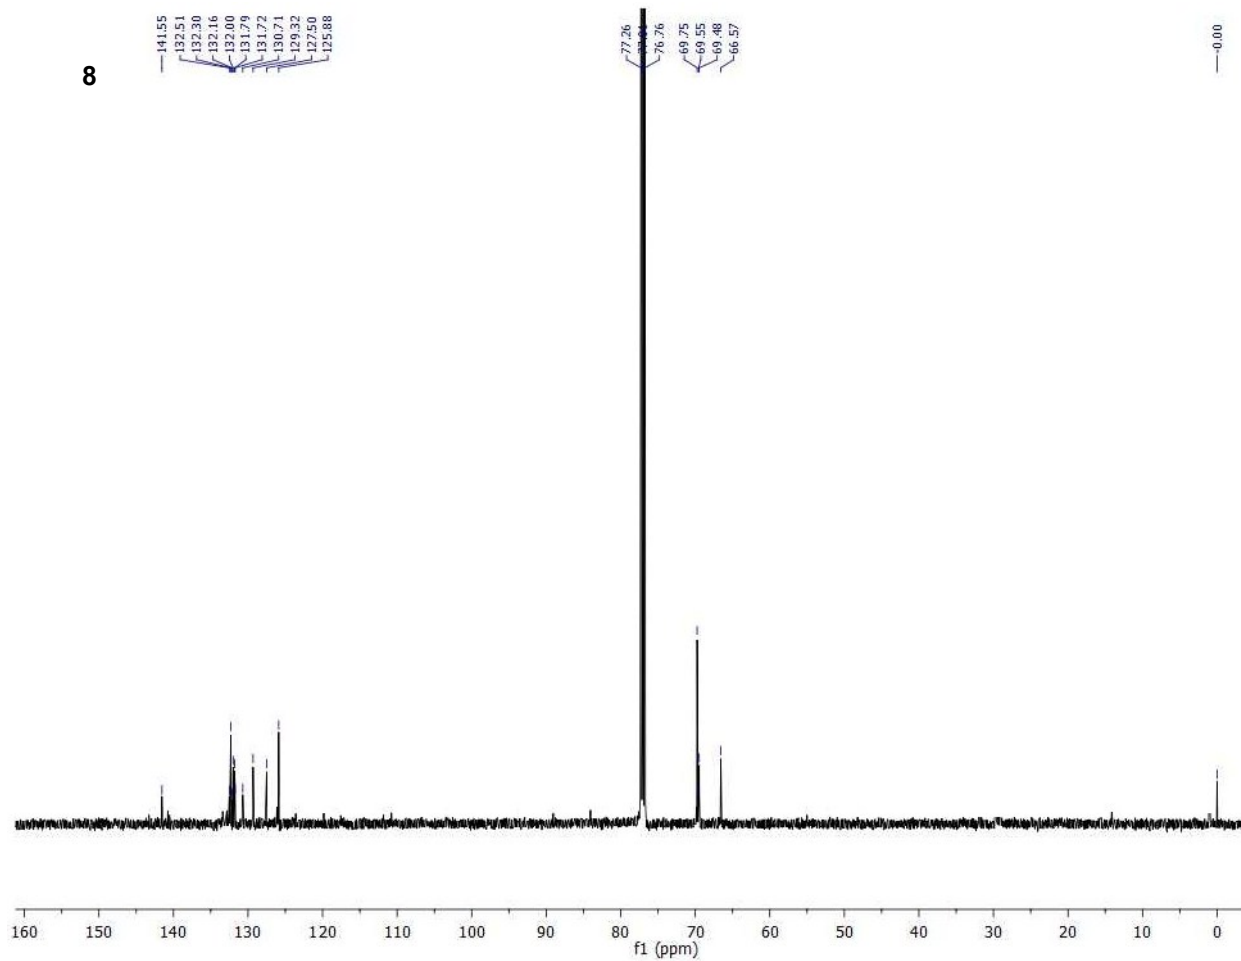

**Figure S35:**  $^{13}\text{C}$  NMR ( $\text{CDCl}_3$ ) of **8**.

## Complete Reference 61

Gaussian 09, Revision B.01, M. J. Frisch, G. W. Trucks, H. B. Schlegel, G. E. Scuseria, M. A. Robb, J. R. Cheeseman, G. Scalmani, V. Barone, B. Mennucci, G. A. Petersson, H. Nakatsuji, M. Caricato, X. Li, H. P. Hratchian, A. F. Izmaylov, J. Bloino, G. Zheng, J. L. Sonnenberg, M. Hada, M. Ehara, K. Toyota, R. Fukuda, J. Hasegawa, M. Ishida, T. Nakajima, Y. Honda, O. Kitao, H. Nakai, T. Vreven, J. A. Montgomery, Jr., J. E. Peralta, F. Ogliaro, M. Bearpark, J. J. Heyd, E. Brothers, K. N. Kudin, V. N. Staroverov, T. Keith, R. Kobayashi, J. Normand, K. Raghavachari, A. Rendell, J. C. Burant, S. S. Iyengar, J. Tomasi, M. Cossi, N. Rega, J. M. Millam, M. Klene, J. E. Knox, J. B. Cross, V. Bakken, C. Adamo, J. Jaramillo, R. Gomperts, R. E. Stratmann, O. Yazyev, A. J. Austin, R. Cammi, C. Pomelli, J. W. Ochterski, R. L. Martin, K. Morokuma, V. G. Zakrzewski, G. A. Voth, P. Salvador, J. J. Dannenberg, S. Dapprich, A. D. Daniels, O. Farkas, J. B. Foresman, J. V. Ortiz, J. Cioslowski, and D. J. Fox, Gaussian, Inc., Wallingford CT, 2010.(Complete reference 60).
